# Supplementary material for: Association of high-sensitivity cardiac troponin T with mortality and cardiovascular events in a community-based prospective study in Beijing
Source: PubMed Central journal article supplement — BMJ Open. 2017 Jun 26;7(6):e013431. doi: 10.1136/bmjopen-2016-013431 (PMC5541394; doi:10.1136/bmjopen-2016-013431), 2017-06-26
Supplement: bmjopen-2016-013431.draft_revisions.pdf [file bmjopen-2016-013431.draft_revisions.pdf]

# BMJ Open

## Cardiac Troponin T Measured by a Highly Sensitive Assay Predicts All-Cause Mortality and Cardiovascular Events in a Community-Dwelling Population

|                                 |                                                                                                                                                                                                                                                                                                                                                        |
|---------------------------------|--------------------------------------------------------------------------------------------------------------------------------------------------------------------------------------------------------------------------------------------------------------------------------------------------------------------------------------------------------|
| Journal:                        | <i>BMJ Open</i>                                                                                                                                                                                                                                                                                                                                        |
| Manuscript ID                   | bmjopen-2016-013431                                                                                                                                                                                                                                                                                                                                    |
| Article Type:                   | Research                                                                                                                                                                                                                                                                                                                                               |
| Date Submitted by the Author:   | 14-Jul-2016                                                                                                                                                                                                                                                                                                                                            |
| Complete List of Authors:       | Xiao, Wenkai<br>Ye, Ping; Chinese PLA General Hospital, Geriatric Cardiology<br>Cao, Ruihua; Chinese PLA General Hospital, Geriatric Cardiology<br>Liu, Yuan; Chinese PLA General Hospital, Geriatric Cardiology<br>Bai, Yongyi; Chinese PLA General Hospital, Geriatric Cardiology<br>Wu, Hongmei; Chinese PLA General Hospital, Geriatric Cardiology |
| <b>Primary Subject Heading</b>: | Cardiovascular medicine                                                                                                                                                                                                                                                                                                                                |
| Secondary Subject Heading:      | Public health                                                                                                                                                                                                                                                                                                                                          |
| Keywords:                       | Biomarkers, Cardiac Epidemiology < CARDIOLOGY, risk assessment, prognosis                                                                                                                                                                                                                                                                              |
|                                 |                                                                                                                                                                                                                                                                                                                                                        |

SCHOLARONE™  
Manuscripts

1  
2  
3  
4 **Cardiac Troponin T Measured by a Highly Sensitive Assay Predicts**  
5  
6 **All-Cause Mortality and Cardiovascular Events in a**  
7  
8  
9 **Community-Dwelling Population**  
10

11  
12  
13  
14 Wenkai Xiao, Ping Ye \*, Ruihua Cao, Yuan Liu , Yongyi Bai , Hongmei Wu

15  
16 Department of Geriatric Cardiology, Chinese PLA General Hospital, No. 28, Fuxing  
17  
18 Road, Beijing, 100853, China  
19

20  
21 Correspondence to Ping Ye, Department of Geriatric Cardiology, Chinese PLA  
22  
23 General Hospital, Beijing, 100853, China  
24

25  
26 Tel:+86-10-66876369; Fax:+86-10-66876349; E-mail: [yeping301@sina.com](mailto:yeping301@sina.com)  
27

28  
29 **Keywords:** Biomarkers; High-sensitivity cardiac troponin T; cardiovascular diseases;  
30  
31 prognosis; risk assessment.  
32

33  
34 **Word count:** 5273  
35  
36  
37  
38  
39  
40  
41  
42  
43  
44  
45  
46  
47  
48  
49  
50  
51  
52  
53  
54  
55  
56  
57  
58  
59  
60

## Abstract

**Objective:** The prognostic value of cardiac troponins in apparently healthy population is less well established. The aim of this study is to investigate the prognostic properties of high-sensitivity cardiac troponin T (hs-cTnT) for long-term adverse outcomes.

**Setting:** A community-dwelling prospective survey of residents from two communities in Beijing.

**Participants:** From September 2007 to January 2009, 1680 participants were initially enrolled, 1,499 (870 females, mean age 61.4 years) completed and were followed up for a median of 4.8 years (interquartile range, 4.5-5.2).

**Outcome measures:** primary outcomes were the occurrence of all-cause mortality and major cardiovascular events.

**Results:** In total, 820 individuals (54.7%) had detectable hs-cTnT levels. During follow-up, 52 participants (3.5%) died, 154 (10.3%) had major cardiovascular events, and 99 (6.6%) experienced new-onset coronary events. Compared with participants with undetectable levels, those with hs-cTnT levels in the highest category ( $\geq 14$  ng/L) had significantly increased risk for all-cause mortality (adjusted hazard ratio [aHR] = 2.07; 95% confidence interval [CI], 1.05 to 3.01), major cardiovascular events (aHR = 3.27; 95% CI, 1.88 to 5.70), and coronary events (aHR = 4.50; 95% CI, 2.26 to 9.02) but not of stroke incident (aHR = 1.27; 95% CI, 0.69 to 2.62) in covariate-adjusted analyses accounting for demographics, traditional cardiovascular risk factors, renal function, and biomarkers of inflammation and cardiac wall stress. Also the significant

1  
2  
3  
4 associations were presented when hs-cTnT levels were modeled as a continuous  
5  
6 variable and when analyzing changes over time in the hs-cTnT levels with adverse  
7  
8 outcomes.  
9

10  
11 **Conclusions:** In this cohort of individuals from community-based population,  
12  
13 cardiac troponin T measured with a highly sensitive assay was associated with  
14  
15 subsequent risk for all-cause mortality and major cardiovascular events, which might  
16  
17 support selection of at risk individuals.  
18  
19

### 20 21 22 23 **Strengths and limitations of this study**

- 24  
25 ■ Evaluating the prognostic properties of both baseline and change in hs-cTnT for  
26  
27 long-term adverse outcomes in a large community-dwelling study.  
28  
29
- 30  
31 ■ Reliably detecting minimal subclinical myocardial injury in apparently healthy  
32  
33 population over a wide age range.  
34  
35
- 36  
37 ■ Absence of echocardiographic and coronary artery imaging data and can, thus,  
38  
39 not provide causal explanations on the associations between hs-cTnT and  
40  
41 outcomes.  
42  
43  
44  
45  
46  
47  
48  
49  
50  
51  
52  
53  
54  
55  
56  
57  
58  
59  
60

## Introduction

Cardiovascular disease (CVD) is still the major disease which seriously threat to human's health and lives. There is concordant evidence that prevention is an important key to lessen the CVD burden, but the risk prediction of adverse cardiovascular events in low- to intermediate-risk individuals is an important challenge.[1] This part of population are at risk for developing CVD but not early identified by currently risk factors screening methods.[2-3] While circulating biomarkers are an important supplement, one of the most interesting biomarkers in this context is troponins. Cardiac troponin T (cTnT) is a regulatory protein expressed by cardiac myocytes and released in the setting of myocardial injury.[4-5] A sensitive and specific marker of cardiomyocytes damage, cTnT is typically used clinically in the earlier exclusion or confirmation of the diagnosis of acute myocardial infarction (AMI).

However, cTnT levels can also be elevated and clinically meaningful in the absence of myocardial ischemia. Detectable levels of cTnT can also be useful for detecting subclinical CVD and assessing CVD risk in the general population; however, cTnT is only detectable in a small percentage of the general population using standard assays,[6-7] which limit the utility for our clinical applications. Recently, a highly sensitive cTnT (Hs-cTnT) assay has been developed, which can detect 10-fold lower concentrations than the standard fourth-generation assay. The introduction of this new assay has enabled detection of very low levels of circulating cTnT, even in some asymptomatic general population.[8]

Hs-cTnT levels below the detection limit of standard assays were independently

1  
2  
3 associated with adverse cardiovascular events in patients with heart failure (HF)[9] or  
4 stable coronary heart disease (CHD).[10] But the clinical significance of detectable  
5  
6 cTnT with the use of the new assay in the apparently healthy population is less well  
7  
8 established. The main objective of this study was to investigate the prognostic value  
9  
10 of minimally detectable hs-cTnT levels in predicting adverse clinical events in a  
11  
12 population of community-based subjects.  
13  
14  
15  
16  
17  
18

## 19 **Methods**

### 20 **Study population**

21  
22 This is a prospective observational study of people living in the Pingguoyuan  
23  
24 area of the Shijingshan district in Beijing, China. Subjects with severe systemic  
25  
26 diseases such as immunologic diseases, endocrinic and metabolic disease (except for  
27  
28 diabetes mellitus [DM]), inflammation, tumorous, severe hepatic or renal diseases,  
29  
30 and a history of ischemic heart disease or HF were excluded. Briefly, between  
31  
32 September 2007 and January 2009, a total of 1680 participants were initially recruited  
33  
34 for cross-sectional analysis of CVD risk factors. After the initial evaluation, recruited  
35  
36 subjects were contacted every 2 years for follow-up, and the last follow-up visits were  
37  
38 conducted through September 30, 2013, the median follow-up was 4.8 (interquartile  
39  
40 range 4.5-5.2) years. In our investigation, 181 participants were lost to follow-up and  
41  
42 were excluded from the study, complete data were acquired from 1499 participants  
43  
44 (return rate, 89.2%). All participants provided written informed consent at time of  
45  
46 enrollment, and the study was approved by the Ethics Committee of the Chinese  
47  
48 People's Liberation Army (PLA) General Hospital.  
49  
50  
51  
52  
53  
54  
55  
56  
57  
58  
59  
60

## Data collection

Baseline characteristics for this analysis were collected using self-reported standardized questionnaires that included demographics, life-style information, medical history, and medication use. Anthropometrical measurements were obtained by trained medical doctors, and the body mass index (BMI) was derived from height and weight measured with participants wearing light clothing and no shoes. Blood pressures were measured two times on the right arm after 5 minutes of rest in a sitting position, the mean of 2 readings were used for further analysis. Participants were followed up for clinical outcomes by interview. Outcome measures were occurrences of all-cause mortality and major adverse cardiovascular event (MACE), new events were validated by obtaining medical records and adjudicated by 2 independent and blinded reviewers.

## Biomarker Assays

After at least 12 hours of overnight fasting, baseline blood samples were collected from participants between 8 AM and 10 AM at enrollment. Follow-up measurements were performed on blood samples collected 4 to 5 years later. Serum aliquots were frozen at -80°C until analysis in a central laboratory were performed. Concentrations of blood glucose (fasting and 2 hours after an oral glucose tolerance), total cholesterol (TC), triglycerides (TGs), high-density lipoprotein cholesterol (HDL-C), low-density lipoprotein cholesterol (LDL-C), uric acid and serum creatinine levels were measured by routine laboratory analysis.

Hs-cTnT were measured by an electrochemiluminescence immunoassay method

1  
2  
3  
4 using an Elecsys Troponin T highly sensitive assay (Roche Diagnostics GmbH,  
5  
6 Mannheim, Germany) on the Modular Analytics E170 autoanalyzer (Roche  
7  
8 Diagnostics). The lower detection limit of the novel assay was 3 ng/L and a reported  
9  
10 99th percentile value in apparently healthy individuals was 14 ng/L.[11] N-terminal  
11  
12 pro-B-type natriuretic peptide (NT-proBNP) concentrations were determined using an  
13  
14 electrochemiluminescence immunoassay (Roche Diagnostics GmbH) on the Roche  
15  
16 analyzer. Levels of high-sensitivity C-reactive protein (hs-CRP) were measured with  
17  
18 the use of immunoturbidimetric assay (Siemens Healthcare Diagnostics, IN, USA) on  
19  
20 a Dimension RxL Max analyzer (Siemens Healthcare Diagnostics).  
21  
22  
23  
24

25  
26 Estimated glomerular filtration rate (eGFR) was calculated using the Chinese  
27  
28 modifying Modification of Diet in Renal Disease (C-MDRD) equation, details of the  
29  
30 computing equation have been published elsewhere.[12]  
31  
32

### 33 34 **Definition of end points**

35  
36 For outcome, we used the incidence of mortality and CVD morbidity after the  
37  
38 baseline screening. All-cause mortality was determined by review of death certificates.  
39  
40 The definition of MACE comprised nonfatal MI, coronary artery insufficiency  
41  
42 (identified by coronary artery imaging or receiving coronary revascularization), stroke  
43  
44 (ischaemic or haemorrhagic), and CVD death. Major coronary events were defined as  
45  
46 nonfatal MI, coronary artery insufficiency, and CHD death. Stroke was characterized  
47  
48 as a neurological deficit attributed to an acute focal injury of the central nervous  
49  
50 system by a vascular cause, including cerebral infarction, intracerebral hemorrhage,  
51  
52 and subarachnoid hemorrhage. [13] For Cox-regression analyses, survival time was  
53  
54  
55  
56  
57  
58  
59  
60



1  
2  
3  
4 defined as the period from the date of baseline blood sample collection to the date of  
5  
6 the first adverse event or end of follow-up.  
7

## 8 9 **Statistical analysis**

10  
11 Continuous variables are reported as mean  $\pm$  standard deviation (SD) or median  
12  
13 (interquartile range) and categorical variables as count and percentages. We modeled  
14  
15 hs-cTnT as both a categorical and a continuous variable. For the analyses of hs-cTnT  
16  
17 as a categorical variable, we divided participants into 4 categories: those with  
18  
19 undetectable hs-cTnT were placed in the first category as the reference group; those  
20  
21 with hs-cTnT levels greater than or equal to the previously reported 99th percentile  
22  
23 value (14 ng/L)[11] were placed in the fourth category, and those with levels between  
24  
25 3 and 14 ng/L were divided into two equal-sized groups for categories 2 and 3.  
26  
27 Demographic and clinical variables were compared across hs-cTnT categories using  
28  
29 the one-way analysis of variance tests for continuous measures, Cuzik's  
30  
31 nonparametric trend test for nonnormally distributed variables, and chi-squared tests  
32  
33 were performed for categorical variables.  
34  
35  
36  
37  
38  
39

40  
41 Cumulative incidence of MACE and all-cause mortality for each category of  
42  
43 hs-cTnT concentration was evaluated using the Kaplan-Meier method and compared  
44  
45 with the log-rank test for trend. Multivariable Cox proportional hazards regression  
46  
47 models were used to analyze associations of hs-cTnT categories with outcomes with  
48  
49 category 1 used as the referent. The models were serially adjusting for demographics,  
50  
51 traditional cardiovascular risk factors, renal function and other biomarkers (Hs-CRP  
52  
53 and NT-proBNP) levels. We also carried an exploratory analysis in which we regarded  
54  
55  
56  
57  
58  
59  
60

1  
2  
3  
4  
5  
6  
7  
8  
9  
10  
11  
12  
13  
14  
15  
16  
17  
18  
19  
20  
21  
22  
23  
24  
25  
26  
27  
28  
29  
30  
31  
32  
33  
34  
35  
36  
37  
38  
39  
40  
41  
42  
43  
44  
45  
46  
47  
48  
49  
50  
51  
52  
53  
54  
55  
56  
57  
58  
59  
60

hs-cTnT as a continuous variable and assessed the relationship between natural logarithm transformed hs-cTnT values and end points. In this analysis, values of hs-TnT that were below the lower limit of detection were assigned to 1.5 ng/L (i.e., one-half of the lower limit of detection).

In view of the markedly skewed distribution of hs-cTnT, changes in concentrations over time were calculated as the difference between the natural logarithm of the concentrations at follow-up and at baseline. The association between changes in hs-cTnT levels and outcomes were also evaluated in Cox proportional hazards models. The change in hs-cTnT levels was entered as a continuous variable and adjusted for baseline concentration of hs-cTnT and for the relevant variables described previously in multivariable models.

All data were analyzed using the SPSS statistical package software (version 17.0). A two-sided value of  $P < 0.05$  was considered statistically significant.

## Results

### Participant Characteristics

For the present analyses, 1499 participants were included. The mean ( $\pm$ SD) age of participants was  $61.4 \pm 11.4$  years and 58.0% were women at enrollment. Hs-cTnT was detectable at baseline in 820 individuals (54.7%) and was equal to or higher than 14 ng/L in 172 participants (11.5%), the detectable hs-cTnT levels ranged from 3 to 176.4 ng/L. Table 1 shows baseline characteristics by hs-cTnT categories. Compared with those with lower hs-cTnT levels, individuals with higher levels were older; were more likely to be male, more frequently hypertensive, and diabetic; had lower eGFR,

1  
2  
3 HDL-C levels; and had higher uric acid, NT-proBNP levels. In cardiovascular drug  
4  
5 use, taking of antihypertensive, antidiabetic, and aspirin use varied across levels of  
6  
7  
8  
9 hs-cTnT.

### 10 11 **Outcomes by Baseline Hs-cTnT Level**

12  
13  
14 Over a median follow-up period of 4.8 years (interquartile range, 4.5-5.2), 154  
15  
16 participants experienced new-onset MACE (including 99 coronary events and 61  
17  
18 strokes, some participants had more than one event ) and 52 deaths occurred from any  
19  
20 cause. The cumulative incidence of MACE and all-cause mortality by hs-cTnT  
21  
22 categories are shown in Figure 1. Just like display in the Kaplan-Meier survival  
23  
24 analysis, there was a graded increase in the probability of adverse clinical events  
25  
26 across the categories. The unadjusted incidence rate for MACE ranged from 3.7% in  
27  
28 those participants with undetectable hs-cTnT levels to 23.3% for subjects in the  
29  
30 highest category (P<0.001, log-rank test). Similar trends were discovered for coronary  
31  
32 events, stroke, and all-cause mortality, with a particularly high risk found for those in  
33  
34  
35  
36  
37  
38  
39  
40  
41  
42  
43  
44  
45  
46  
47  
48  
49  
50  
51  
52  
53  
54  
55  
56  
57  
58  
59  
60 the highest category.

**Table1. Characteristics of Study Population by Baseline high-sensitivity troponin T Levels**

| Characteristics          | Hs-cTNT Group (ng/L)        |                               |                               |                         | P value |
|--------------------------|-----------------------------|-------------------------------|-------------------------------|-------------------------|---------|
|                          | Group 1<br><3.00 (n = 679 ) | Group 2<br>3.00-6.21 (n=324 ) | Group 3<br>6.22-<14 (n= 324 ) | Group4<br>≥14 (n = 172) |         |
| Demographic              |                             |                               |                               |                         |         |
| Age ( years)             | 58.6±10.3                   | 63.1±10.7                     | 64.2±12.4                     | 61.8±11.5               | <0.001  |
| Male Sex n (%)           | 202 (29.7)                  | 163 (50.3)                    | 170 (52.5)                    | 94 (54.7)               | <0.001  |
| BMI (kg/m <sup>2</sup> ) | 25.5±3.5                    | 25.7±3.2                      | 25.6±3.3                      | 25.8±3.5                | 0.498   |
| Medical history          |                             |                               |                               |                         |         |
| Hypertension n (%)       | 258 (38.0)                  | 159 (49.1)                    | 176 (54.3)                    | 97 (56.4)               | <0.001  |
| Diabetes mellitus n (%)  | 99 (14.6)                   | 72 (22.2)                     | 76 (23.5)                     | 45 (26.2)               | <0.001  |
| Current smoking n (%)    | 85 (12.5)                   | 69 (21.3)                     | 62 (19.1)                     | 31(18.0)                | 0.003   |
| Systolic BP (mm Hg)      | 131.5±16.5                  | 132.7±17.3                    | 132.8±17.2                    | 133.2±17.1              | 0.041   |
| Diastolic BP (mm Hg)     | 77.1±9.7                    | 77.3±10.0                     | 76.4±10.5                     | 76.1±11.1               | 0.372   |
| Laboratory values        |                             |                               |                               |                         |         |
| FBG (mmol/L)             | 5.3±1.4                     | 5.3±1.5                       | 5.5±1.7                       | 5.8±1.9                 | 0.076   |
| PBG (mmol/L)             | 7.5±3.7                     | 7.1±3.2                       | 8.1±4.3                       | 8.9±4.4                 | <0.001  |

|                                   |                   |                   |                   |                  |        |
|-----------------------------------|-------------------|-------------------|-------------------|------------------|--------|
| Total cholesterol (mmol/L)        | 5.1±0.9           | 5.1±0.9           | 5.1±0.9           | 5.0±0.9          | 0.464  |
| Triglycerides (mmol/L)            | 1.8±1.1           | 1.7±1.1           | 1.7±1.0           | 2.0±1.4          | 0.04   |
| LDL cholesterol (mmol/L)          | 3.0±0.7           | 2.9±0.7           | 3.0±0.7           | 3.0±0.7          | 0.136  |
| HDL cholesterol (mmol/L)          | 1.4±0.4           | 1.4±0.3           | 1.3±0.4           | 1.3±0.4          | 0.001  |
| Uric acid (µmol/L)                | 279.0±68.2        | 295.9±73.3        | 301.2±75.4        | 309.5±76.2       | <0.001 |
| eGFR (mL/min/1.73m <sup>2</sup> ) | 90.1±14.5         | 88.7±13.4         | 87.5±15.2         | 84.7±16.5        | 0.001  |
| NT-proBNP (pg/mL)                 | 37.2 (17.9, 75.3) | 38.9 (17.9, 74.4) | 46.6 (22.3, 90.1) | 49.3 (17.1, 112) | 0.003  |
| Hs-CRP (mg/L)                     | 2.4 (1.3, 3.4)    | 2.3 (1.4, 3.4)    | 2.2 (1.5, 3.5)    | 2.4 (1.6, 3.6)   | 0.383  |
| Medication use                    |                   |                   |                   |                  |        |
| Antihypertensives n (%)           | 187 (27.5)        | 122 (37.7)        | 139 (42.9)        | 80 (46.5)        | <0.001 |
| Antidiabetic n (%)                | 64 (9.4)          | 44 (13.6)         | 52 (16.0)         | 29 (16.9)        | 0.0028 |
| Lipid lowering n (%)              | 109 (16.1)        | 61 (18.8)         | 58 (17.9)         | 34 (19.8)        | 0.149  |
| Aspirin n (%)                     | 137 (20.2)        | 79 (24.4)         | 89 (27.5)         | 55 (31.9)        | <0.001 |

Values are reported as n (%), mean ± SD, or median (interquartile range). BMI=body mass index; BP=blood pressure; eGFR =estimated glomerular filtration rate; FBG=fasting blood glucose;

HDL= high-density lipoprotein; Hs-CRP = high-sensitivity C-reactive protein; LDL = low-density-lipoprotein; PBG= postprandial blood glucose; NT-proBNP = N-terminal pro-type B

natriuretic peptide.

## Associations of Baseline hs-cTnT Levels With MACE and All-Cause Mortality

In a series of Cox proportional hazards models adjusting for age and gender (model 1) and further adjusting for traditional cardiovascular risk factors (model 2), higher hs-cTnT categories demonstrated a graded association with MACE. Only modest attenuation of the hazards was found with further adjustment for renal function (model 3). Although significant attenuation was discovered with additional adjustment for hs-CRP and NT-proBNP level (model 4), hs-cTnT in the third category (hazard ratio [HR], 2.31 [95% CI, 1.39-3.84]) and fourth category (HR, 3.27 [95% CI, 1.88-5.70]) remained independently associated with MACE in the fully adjusted models. Participants in hs-cTnT categories 3 and 4 also had a significantly higher risk of coronary events compared with participants with undetectable levels (HRs of 2.76 [95% CI, 1.44-5.31] and 4.50 [95% CI, 2.26 - 9.02], respectively, in model 4, Table2). However, associations of hs-cTnT levels with incident stroke were markedly attenuated and no longer significant after adjusting for NT-proBNP (model 4, Table2). Not only in the univariate Cox regression analysis but also in multivariate models, those participants in the highest hs-cTnT category were independently associated with the all-cause mortality risk (HR 2.07, [95% CI, 1.05-3.01]).

In an exploring research of hs-cTnT as a continuous variable after natural logarithm transformation, we disclosed a continuous association with MACE incident (per one-ln unit increment; HR, 1.67; 95% CI, 1.04–2.68;  $P < 0.001$ ), with coronary events (HR, 1.68; 95% CI, 1.35–2.08;  $P < 0.001$ ) and with all-cause death (HR, 1.50;

95% CI, 1.26–1.79; P=0.003) in the fully multivariate models including variables described in Table 2. The same, the relationship between hs-cTnT as a continuous variable and stroke risk were not presented in the final adjusted models (HR, 1.06; 95% CI, 0.87 – 1.32; P=0.17).

**Table 2. Cox Proportional Hazards Models Analysis for Associations Between Baseline Hs-cTnT Levels and Outcomes**

|                     | Hazard Ratio (95% Confidence Interval) |                          |                          |                     |
|---------------------|----------------------------------------|--------------------------|--------------------------|---------------------|
|                     | Group 1<br><3.00 ng/L                  | Group 2<br>3.0-6.21 ng/L | Group 3<br>6.22-<14 ng/L | Group 4<br>≥14 ng/L |
| No.                 | 679                                    | 324                      | 324                      | 172                 |
| MACE                | n=25 (3.7%)                            | n=30 (9.3%)              | n=59 (18.2%)             | n=40 (23.3%)        |
| Model 1             | 1[Reference]                           | 1.65 (0.97-2.81)         | 2.65 (1.64-4.27)         | 4.20 (2.51-7.02)    |
| Model 2             | 1[Reference]                           | 1.52 (0.89-2.59)         | 2.41 (1.48-3.91)         | 3.82 (2.27-6.43)    |
| Model 3             | 1[Reference]                           | 1.52 (0.89-2.61)         | 2.38 (1.47-3.88)         | 3.79 (2.26-6.39)    |
| Model 4             | 1[Reference]                           | 1.68 (0.97-2.92)         | 2.31 (1.39-3.84)         | 3.27 (1.88-5.70)    |
| Coronary event      | n=14 (2.1%)                            | n=17 (5.3%)              | n=41 (12.7%)             | n=27 (15.7%)        |
| Model 1             | 1[Reference]                           | 1.69 (0.83-3.44)         | 3.39 (1.82-6.29)         | 5.23 (2.7-10.14)    |
| Model 2             | 1[Reference]                           | 1.61 (0.78-3.29)         | 3.25 (1.74-6.07)         | 5.5 (2.84-10.64)    |
| Model 3             | 1[Reference]                           | 1.57 (0.76-3.22)         | 3.09 (1.65-5.79)         | 5.14 (2.65-9.98)    |
| Model 4             | 1[Reference]                           | 1.42 (0.71-2.89)         | 2.76 (1.44-5.31)         | 4.50 (2.26-9.02)    |
| Stroke event        | n=11 (1.6%)                            | n=13 (4.0%)              | n=20 (6.2%)              | n=17 (9.9%)         |
| Model 1             | 1[Reference]                           | 1.59 (0.71-3.57)         | 1.94 (0.91-4.14)         | 3.84 (1.75-8.43)    |
| Model 2             | 1[Reference]                           | 1.47 (0.65-3.29)         | 1.77 (0.83-3.79)         | 3.19 (1.42-7.16)    |
| Model 3             | 1[Reference]                           | 1.47 (0.65-3.31)         | 1.70 (0.79-3.66)         | 3.16 (1.41-7.10)    |
| Model 4             | 1[Reference]                           | 1.03 (0.50-2.09)         | 1.13 (0.57-2.14)         | 1.27 (0.69-2.62)    |
| All-cause mortality | n=8 (1.2%)                             | n=7 (2.2%)               | n=16 (4.9%)              | n=21 (12.2%)        |
| Model 1             | 1[Reference]                           | 1.13 (0.41-3.14)         | 1.99 (0.83-4.76)         | 6.14 (2.61-14.46)   |

|         |              |                  |                  |                   |
|---------|--------------|------------------|------------------|-------------------|
| Model 2 | 1[Reference] | 1.13 (0.41-3.14) | 1.78 (0.73-4.35) | 4.87 (1.99-11.88) |
| Model 3 | 1[Reference] | 1.14 (0.41-3.16) | 1.79 (0.73-4.38) | 4.87 (1.99-11.88) |
| Model 4 | 1[Reference] | 1.01 (0.40-1.15) | 1.09 (0.43-2.76) | 2.07 (1.05-3.01)  |

Abbreviations: MACE, major adverse cardiovascular event.

Models are defined as follows: model 1=adjusted for age and gender; model 2=adjusted for model 1+ presence of hypertension or diabetes mellitus, smoking status (current vs not), systolic blood pressure, postprandial blood glucose, total cholesterol, high-density lipoprotein cholesterol, antihypertensive medication use, and antidiabetic medication use; model 3= adjusted for model 2+estimated glomerular filtration rate; model 4= adjusted for model 3+ high-sensitivity C-reactive protein and N-terminal pro-B-type natriuretic peptide (both ln transformed).

## Changes in hs-cTnT Concentration During Follow-up and

### Subsequent Events

Table 3 represents the results of Cox regression analysis for subsequent events in relation to changes in hs-cTnT concentration as a continuous variable. Changes in hs-cTnT concentration were strongly associated with subsequent events except for stroke, even in multivariable analyses that additionally adjusted for baseline hs-cTnT levels. In the fully adjusted models, the HR for MACE for every unit increasing in hs-cTnT was 1.35 (95% CI: 1.08-1.68,  $p=0.008$ ), as well as coronary event (HR: 1.44, 95% CI: 1.17-1.77,  $p=0.001$ ). Likewise, an increase in hs-cTnT levels was not so remarkably associated with incident stroke (HR: 1.02, 95% CI: 0.64-2.19,  $p=0.242$ ).

**Table 3. Association of Changes in hs-cTnT Concentrations With Subsequent**

#### Events

|                | Multivariable adjusted HR | 95% CI    | p Value |
|----------------|---------------------------|-----------|---------|
| MACE           | 1.35                      | 1.08-1.68 | 0.008   |
| Coronary event | 1.44                      | 1.17-1.77 | 0.001   |



|              |      |           |       |
|--------------|------|-----------|-------|
| Stroke event | 1.02 | 0.64-2.19 | 0.242 |
|--------------|------|-----------|-------|

Abbreviations: HR, hazard ratio; CI, confidence interval; MACE, major adverse cardiovascular event. Data are presented as hazard ratio and 95% confidence intervals for a 1-unit increase of changes in hs-cTnT on a log scale.

Multivariable adjusted model adjusted for the covariates listed in Table 2 Model 4 plus baseline hs-cTnT level.

## Discussion

The main purpose of the current study was to evaluate the usefulness of high-sensitivity cardiac troponin T determination for prediction of major cardiovascular events and all-cause mortality in a community-based study of general population. Several valuable findings emerged from our study. First, we used the up-to-date generation of hs-cTnT assay, allowing us to reliably detect minimal subclinical myocardial injury in some of the general population over a wide age coverage, not restricted to morbid or high-risk individuals. Second, the baseline and kinetic changes of hs-cTnT were powerful and independent predictors of long term MACE and all-cause mortality. Finally, these risk prediction was persistent even after adjustment for traditional cardiovascular risk factors as well as adjustment for biomarkers of inflammation and cardiac wall strain.

Generally, cardiac troponins are the preferred biomarkers of myocardial necrosis, typically in the diagnosis of acute coronary syndromes, but the recently available hs-cTnT assay has allowed detection of much lower concentrations of circulating cTnT. More recent observations have showed that very low levels of circulating cTnT can be detectable in patients with stable coronary artery disease,[14-15] and even in the general population by this new assay.[16-17] The exact mechanisms of troponins

1  
2  
3  
4 release in apparently healthy individuals are not well clarified, one possibility is the  
5  
6 existence of asymptomatic cardiac ischemia with minimal myocardial injury resulting  
7  
8 in troponins release without any symptoms.[18] Other mechanisms including  
9  
10 cardiomyocyte apoptosis,[19] physiological cell turnover,[20] or subclinical cardiac  
11  
12 structural or functional abnormalities.[21-22]  
13  
14

15  
16 The independent association between circulating levels of hs-cTnT and the  
17  
18 incidence of adverse cardiovascular outcomes were previous reported in patients with  
19  
20 chronic HF and stable CHD, and we now extend the findings to a general population  
21  
22 of middle-aged to elderly. One important finding is the observation that the presence  
23  
24 of an elevated hs-cTnT level (in the highest category) was associated with adverse  
25  
26 outcomes regarding all-cause mortality and the MACE. However, the associations of  
27  
28 minimally detectable hs-cTnT (especially those below 6.2ng/L, in the second category)  
29  
30 with death or MACE were not present in comparison to the undetected group. It has  
31  
32 been proposed that such levels may be physiological, reflecting normal myocardial  
33  
34 cell turnover and apoptosis within the senescent heart tissue.[23] Further research is  
35  
36 required into which hs-cTnT threshold value may best be used in risk prediction.  
37  
38  
39  
40  
41  
42  
43

44 While other biomarkers such as hs-CRP and NT-proBNP have been used to  
45  
46 identify apparently healthy individuals who are at increased CVD risk,[24-25] our  
47  
48 investigation indicates that hs-cTnT is also independent of these biomarkers. In this  
49  
50 cohort, although associations with death and cardiovascular events were significantly  
51  
52 attenuated after additional adjustment for levels of NT-proBNP, hs-cTnT remained  
53  
54 independently predictive for end points in the final model, suggesting that the two  
55  
56  
57  
58  
59  
60

1  
2  
3  
4 biomarkers convey slightly different information in cardiac structural and functional  
5  
6 abnormalities. The HRs remained statistically significant after adjusting for traditional  
7  
8 cardiovascular risk factors and renal function, is also in agreement with data from  
9  
10 other studies.[8, 26] All these data indicate that very low levels of hs-cTnT may  
11  
12 identify subclinical myocardial injury and lead to cardiovascular events risk not fully  
13  
14 estimated by current risk assessment methods.  
15  
16  
17  
18

19 Our data also suggest that even minimal changes in low levels of hs-cTnT have  
20  
21 prognostic characteristic and can help to identify individuals at long-term risk for  
22  
23 adverse events. There seems to be a dose dependent relationship between increased  
24  
25 hs-cTnT and increased risk. Consistently with our results, Christopher et al,[27] have  
26  
27 reported that changes in cTnT concentrations determined with a highly sensitive assay  
28  
29 were significantly associated with incident HF and cardiovascular death in community  
30  
31 -based older adults. Also, in a prospective cohort of ambulatory older adults, a strong  
32  
33 increase in the risk of sudden cardiac death [28] and incident atrial fibrillation [29]  
34  
35 were associated with changes over time in hs-cTnT concentrations. Although these  
36  
37 changes may reflect normal physiological variation, their relation to future adverse  
38  
39 events regardless of baseline hs-cTnT levels indicates that they may really represent  
40  
41 dynamic changes in risk stratification.  
42  
43  
44  
45  
46  
47  
48

49 In contrast to the strong associations with mortality and MACE, hs-cTnT was not  
50  
51 associated with stroke occurrence after adjustment for multiple variables. There are  
52  
53 several potential explanations for this finding. First, cardiac troponin specially reflects  
54  
55 myocardial necrosis or subclinical myocardial injury, some previous studies indicate  
56  
57  
58  
59  
60

1  
2  
3  
4 that structural heart abnormalities are more powerful determinants of myocardial  
5  
6 injury among participants in the general population than coronary atherosclerosis.  
7  
8 [30-31] Second, the Atherosclerosis Risk in Communities (ARIC) Study[32] showed  
9  
10 that elevated plasma hs-cTnT levels were related with increased risk of non-lacunar  
11  
12 ischemic strokes, and especially cardioembolic stroke, but not with hemorrhagic  
13  
14 stroke in the general population. Epidemiological data demonstrated that there was  
15  
16 difference in stroke subtypes between Chinese and western, intracerebral hemorrhage  
17  
18 (ICH) accounts for only 10-15% of strokes in most western populations,[33] whereas  
19  
20 up to 55% of strokes in the Chinese population are ICH.[34] Although analysis for  
21  
22 likely ischemic stroke as an endpoint had also been carried out (data not shown), the  
23  
24 number of ischemic cause was less than one half of all strokes, and it was impossible  
25  
26 to obtain an evident difference in the results.  
27  
28  
29  
30  
31  
32

33  
34 Our study also has several limitations. First, cardiovascular treatment has changed  
35  
36 with time and it is possible that more prevalent use of medicines such as statins and  
37  
38 antiplatelet drugs could lower the predictive value of hs-cTnT. Second, we lack  
39  
40 echocardiographic and coronary artery imaging data and can, thus, not provide causal  
41  
42 explanations on the associations between hs-cTnT, cardiac abnormalities, and  
43  
44 outcomes. Third, the incidence rate of the adverse events is relatively low in this  
45  
46 cohort and hs-cTnT are detected in a considerable proportion, which limits its  
47  
48 potential for long-term predictive usefulness. So the predictive value of hs-cTnT need  
49  
50 to be further validated in other observational studies.  
51  
52  
53  
54  
55

## 56 **Conclusion**

57  
58  
59  
60

1  
2  
3  
4 In this prospective cohort of community-dwelling population, we found both  
5  
6 baseline and change in cardiac troponin T which detected by a highly sensitive assay  
7  
8 were independently associated with adverse outcomes. It is suggested that hs-cTnT  
9  
10 may be an important biomarker in the prediction of mortality and cardiovascular  
11  
12 events in apparently healthy individuals. Further investigations therefore are  
13  
14 warranted to elucidate mechanisms for hs-cTnT release in these individuals and to test  
15  
16 whether active interventions can reduce the associated risk contributed by elevated  
17  
18 troponin levels.  
19  
20  
21  
22

23  
24 **Contributorship statement:** The manuscript has been read and approved by all  
25  
26 of the authors. All authors contributed to the intellectual development of this paper.

27  
28  
29 Conceived and designed the experiments: Ping Ye. Performed the experiments:  
30  
31 Wenkai Xiao, Yuan Liu. Analyzed the data: Wenkai Xiao and Yongyi Bai. Wrote the  
32  
33 manuscript: Wenkai Xiao. Supervised data collection: Rui Cao, Hongmei Wu.  
34  
35

36  
37 **Competing Interests:** The authors have declared that no competing interests  
38  
39 exist.  
40

41  
42 **Funding:** This study was supported by grants from the Key National Basic  
43  
44 Research Program of China (2012CB517503, 2013CB530804) and the Key Science  
45  
46 and Technology Foundation of China (2012ZX09303004-002) to P Ye.  
47  
48

49  
50 **Data sharing statement:** The additional unpublished data from the study are  
51  
52 available. We can share the original data for this research article.  
53

54  
55 **Acknowledgements** We thank our colleagues at the Department of Laboratory  
56  
57 Medicine of the PLA General Hospital for their help with biochemical measurements.  
58  
59  
60

We are also grateful to all study participants for their rigorous work.

## References

1. Khot UN, Khot MB, Bajzer CT, et al. Prevalence of conventional risk factors in patients with coronary heart disease. *JAMA* 2003;290:898-904.
2. Melander O, Newton-Cheh C, Almgren P, et al. Novel and conventional biomarkers for prediction of incident cardiovascular events in the community. *JAMA* 2009;302:49-57.
3. Blankenberg S, Zeller T, Saarela O, et al. Contribution of 30 biomarkers to 10-year cardiovascular risk estimation in 2 population cohorts: the MONICA, Risk, Genetics, Archiving, and Monograph (MORGAM) biomarker project. *Circulation* 2010;121:2388-97.
4. Thygesen K, Mair J, Katus H, et al. Recommendations for the use of cardiac troponin measurement in acute cardiac care. *Eur Heart J* 2010;31: 2197–204.
5. Bandstein N, Ljung R, Johansson M, et al. Undetectable High-Sensitivity Cardiac Troponin T Level in the Emergency Department and Risk of Myocardial Infarction. *J Am Coll Cardiol* 2014;63:2569-78.
6. Zethelius B, Berglund L, Sundstrom J, et al. Use of multiple biomarkers to improve the prediction of death from cardiovascular causes. *N Engl J Med* 2008;358: 2107–16.
7. Daniels LB, Laughlin GA, Clopton P, et al. Minimally elevated cardiac troponin T and elevated N-terminal pro-B-type natriuretic peptide predict mortality in older adults: results from the Rancho Bernardo Study. *J Am Coll Cardiol* 2008;52:450–9.

- 1  
2  
3  
4 8. Eggers KM, Al-Shakarchi J, Berglund L, et al. High-sensitive cardiac troponin T  
5  
6 and its relations to cardiovascular risk factors, morbidity, and mortality in elderly men.  
7  
8  
9 *Am Heart J* 2013;166:541-8.
- 10  
11 9. Masson S, Anand I, Favero C, et al. Serial Measurement of Cardiac Troponin T  
12  
13 Using a Highly Sensitive Assay in Patients With Chronic Heart Failure. *Circulation*  
14  
15 2012;125:280-8.
- 16  
17 10. Beatty AL, Ku IA, Christenson RH, et al. High-sensitivity cardiac troponin T and  
18  
19 secondary events in outpatients with coronary heart disease from the Heart and Soul  
20  
21 Study. *JAMA Intern Med* 2013;173:763–9.
- 22  
23 11. Giannitsis E, Kurz K, Hallermayer K, et al. Analytical validation of a high-  
24  
25 sensitivity cardiac troponin T assay. *Clin Chem* 2010;56:254-261.
- 26  
27 12. Ma YC, Zuo L, Chen JH, et al. Modified glomerular filtration rate estimating  
28  
29 equation for chinese patients with chronic kidney disease. *J Am Soc Nephrol* 2006; 17:  
30  
31 2937-44.
- 32  
33 13. Sacco RL, Kasner SE, Broderick JP, et al. An updated definition of stroke for  
34  
35 the 21st century: statement for healthcare professionals from the American  
36  
37 Heart Association/American Stroke Association. *Stroke* 2013;44:2064-89.
- 38  
39 14. Oemrawsingh RM, Cheng JM, García-García HM, et al. High-sensitivity  
40  
41 Troponin T in relation to coronary plaque characteristics in patients with stable  
42  
43 coronary artery disease; results of the ATHEROREMO-IVUS study. *Atherosclerosis*  
44  
45 2016;247:135-41.
- 46  
47 15. Giannitsis E, Spanuth E, Horsch A, et al. High-sensitivity cardiac troponin T and  
48  
49  
50  
51  
52  
53  
54  
55  
56  
57  
58  
59  
60

1  
2  
3  
4 N-terminal pro-B-type natriuretic peptide predict mortality in stable coronary artery  
5  
6 disease: results from the Ludwigshafen Risk and Cardiovascular Health (LURIC)  
7  
8 study. *Clin Chem Lab Med* 2013;51:2019-28.  
9

10  
11 16. Rubin J, Matsushita K, Lazo M, et al. Determinants of minimal elevation  
12  
13 in high-sensitivity cardiac troponin T in the general population. *Clin Biochem* 2016;  
14  
15 49:657-62.  
16  
17

18  
19 17. Saunders JT, Nambi V, de Lemos JA, et al. Cardiac troponin T measured by a  
20  
21 highly sensitive assay predicts coronary heart disease, heart failure, and mortality in  
22  
23 the Atherosclerosis Risk in Communities Study. *Circulation* 2011;123:1367-76.  
24  
25

26  
27 18. Turer AT, Addo TA, Martin JL, et al. Myocardial ischemia induced by rapid  
28  
29 atrial pacing causes troponin T release detectable by a highly sensitive assay: insights  
30  
31 from a coronary sinus sampling study. *J Am Coll Cardiol* 2011;57:2398-405.  
32  
33

34  
35 19. White HD. Pathobiology of troponin elevations: do elevations occur with  
36  
37 myocardial ischemia as well as necrosis? *J Am Coll Cardiol* 2011;57:2406-8.  
38

39  
40 20. Røsjø H, Andreassen J, Edvardsen T, et al. Prognostic usefulness of circulating  
41  
42 high-sensitivity troponin T in aortic stenosis and relation to echocardiographic  
43  
44 indexes of cardiac function and anatomy. *Am J Cardiol* 2011;108:88-91.  
45

46  
47 21. Kawasaki T, Sakai C, Harimoto K, et al. Usefulness of High-Sensitivity Cardiac  
48  
49 Troponin T and Brain Natriuretic Peptide as Biomarkers of Myocardial Fibrosis in  
50  
51 Patients With Hypertrophic Cardiomyopathy. *Am J Cardiol* 2013;112:867-72.  
52  
53

54  
55 22. Jenab Y, Pourjafari M, Darabi F, et al. Prevalence and determinants of elevated  
56  
57 high-sensitivity cardiac troponin T in hypertrophic cardiomyopathy. *Journal of*  
58  
59  
60



1  
2  
3  
4  
5  
6  
7  
8  
9  
10  
11  
12  
13  
14  
15  
16  
17  
18  
19  
20  
21  
22  
23  
24  
25  
26  
27  
28  
29  
30  
31  
32  
33  
34  
35  
36  
37  
38  
39  
40  
41  
42  
43  
44  
45  
46  
47  
48  
49  
50  
51  
52  
53  
54  
55  
56  
57  
58  
59  
60

*Cardiology* 2014;63:140-4.

23. Sze J, Mooney J, Barzi F, et al. Cardiac Troponin and its Relationship to Cardiovascular Outcomes in Community Populations – A Systematic Review and Meta-analysis. *Heart Lung Circ* 2016;25:217-28.

24. Schnell-Inderst P, Schwarzer R, Göhler A, et al. Prognostic value, clinical effectiveness, and cost-effectiveness of high - sensitivity C-reactive protein as a marker for major cardiac events in asymptomatic individuals: a health technology assessment report. *Int J Technol Assess Health Care* 2010; 26:30-9.

25. Daniels LB, Clopton P, deFilippi CR, et al. Serial measurement of N- terminal pro-B-type natriuretic peptide and cardiac troponin T for cardiovascular disease risk assessment in the Multi-Ethnic Study of Atherosclerosis (MESA). *Am Heart J* 2015; 170:1170-83.

26. Scheven L, de Jong PE, Hillege HL, et al. High-sensitive troponin T and N-terminal pro –B type natriuretic peptide are associated with cardiovascular events despite the cross- sectional association with albuminuria and glomerular filtration rate. *Eur Heart J* 2012; 33:2272-81.

27. deFilippi CR, de Lemos JA, Christenson RH, et al. Association of serial measures of cardiac troponin T using a sensitive assay with incident heart failure and cardiovascular mortality in older adults. *JAMA* 2010;304:2494-502.

28. Hussein AA, Gottdiener JS, Bartz TM, et al. Cardiomyocyte injury assessed by a highly sensitive troponin assay and sudden cardiac death in the community: the Cardiovascular Health Study. *J Am Coll Cardiol* 2013;62:2112-20.

- 1  
2  
3  
4 29. Hussein AA, Bartz TM, Gottdiener JS, et al. Serial measures of cardiac troponin  
5  
6 T levels by a highly sensitive assay and incident atrial fibrillation in a prospective  
7  
8 cohort of ambulatory older adults. *Heart Rhythm* 2015;12:879-85.  
9  
10  
11 30. de Lemos JA, Drazner MH, Omland T, et al. Association of troponin T detected  
12  
13 with a highly sensitive assay and cardiac structure and mortality risk in the general  
14  
15 population. *JAMA* 2010;304:2503-12.  
16  
17  
18 31. de Lemos JA, deFilippi CR. Prevalence and significance of detectable troponins as  
19  
20 measured by highly sensitive assays in the general population. *Coronary Artery*  
21  
22 *Disease* 2013;24:705-9.  
23  
24  
25 32. Folsom AR, Nambi V, Bell EJ, et al. Troponin T, N-Terminal Pro-B-Type  
26  
27 Natriuretic Peptide, and Incidence of Stroke. The Atherosclerosis Risk in  
28  
29 Communities Study. *Stroke* 2013; 44:961-7.  
30  
31  
32 33. Lloyd-Jones D, Adams R, Carnethon M, et al. Heart disease and stroke  
33  
34 statistics-2009 update: a report from the American Heart Association Statistics  
35  
36 Committee and Stroke Statistics Subcommittee. *Circulation* 2009;119:480-6.  
37  
38  
39 34. Yang QD, Niu Q, Zhou YH, et al. Incidence of cerebral hemorrhage in the  
40  
41 Changsha community. A prospective study from 1986 to 2000. *Cerebrovasc Dis.*  
42  
43  
44 2004;17:303-13.  
45  
46  
47  
48  
49  
50  
51  
52  
53  
54  
55  
56  
57  
58  
59  
60

1  
2  
3  
4  
5  
6  
7  
8  
9  
10  
11  
12  
13  
14  
15  
16  
17  
18  
19  
20  
21  
22  
23  
24  
25  
26  
27  
28  
29  
30  
31  
32  
33  
34  
35  
36  
37  
38  
39  
40  
41  
42  
43  
44  
45  
46  
47  
48  
49  
50  
51  
52  
53  
54  
55  
56  
57  
58  
59  
60

### A Major adverse cardiovascular events

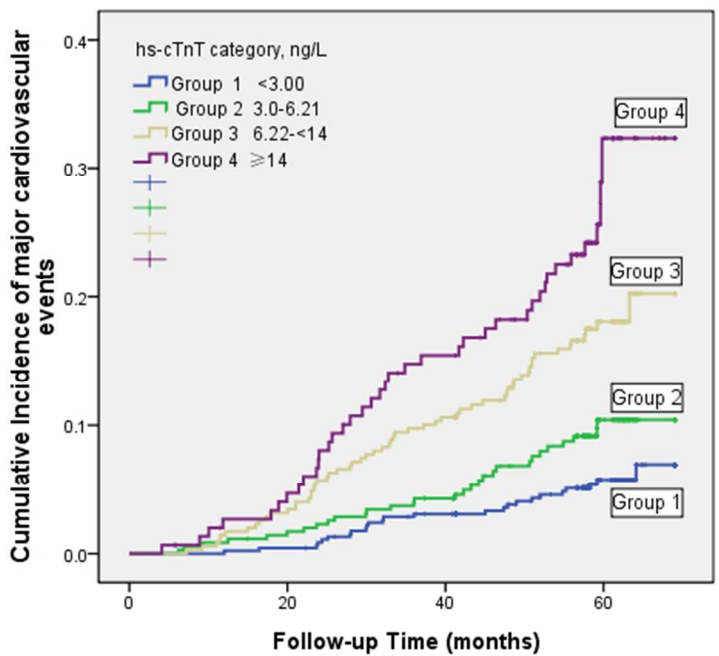

171x140mm (96 x 96 DPI)

view only

1  
2  
3  
4  
5  
6  
7  
8  
9  
10  
11  
12  
13  
14  
15  
16  
17  
18  
19  
20  
21  
22  
23  
24  
25  
26  
27  
28  
29  
30  
31  
32  
33  
34  
35  
36  
37  
38  
39  
40  
41  
42  
43  
44  
45  
46  
47  
48  
49  
50  
51  
52  
53  
54  
55  
56  
57  
58  
59  
60

### B Coronary event

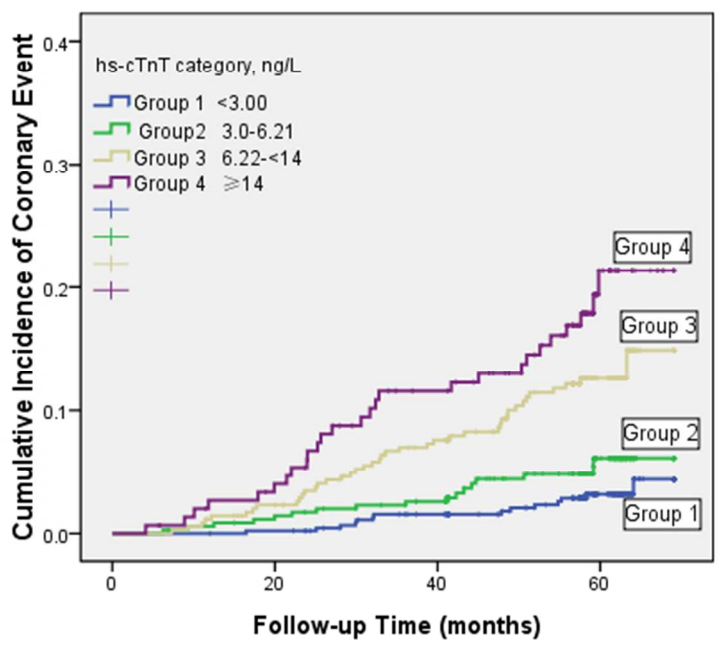

159x128mm (96 x 96 DPI)

For peer review only

1  
2  
3  
4  
5  
6  
7  
8  
9  
10  
11  
12  
13  
14  
15  
16  
17  
18  
19  
20  
21  
22  
23  
24  
25  
26  
27  
28  
29  
30  
31  
32  
33  
34  
35  
36  
37  
38  
39  
40  
41  
42  
43  
44  
45  
46  
47  
48  
49  
50  
51  
52  
53  
54  
55  
56  
57  
58  
59  
60

### C Stroke

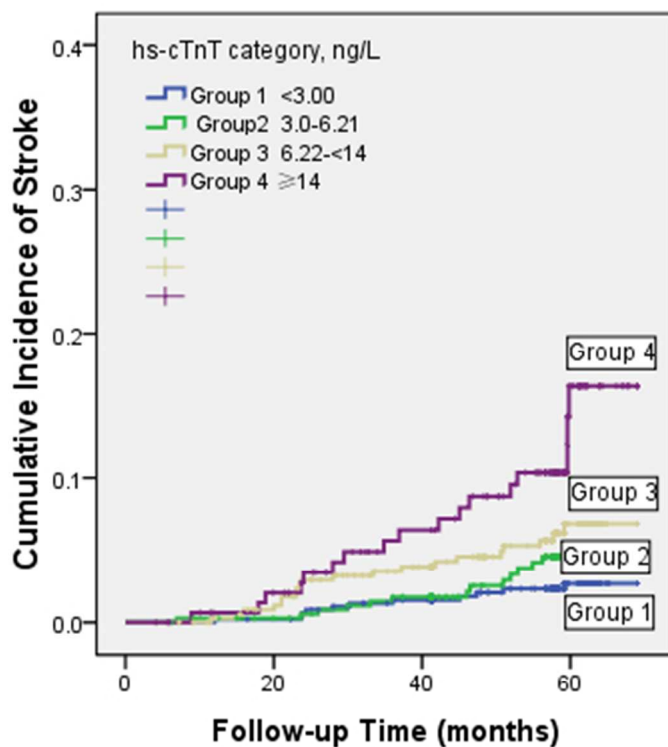

125x129mm (96 x 96 DPI)

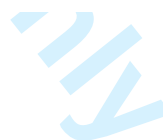

1  
2  
3  
4  
5  
6  
7  
8  
9  
10  
11  
12  
13  
14  
15  
16  
17  
18  
19  
20  
21  
22  
23  
24  
25  
26  
27  
28  
29  
30  
31  
32  
33  
34  
35  
36  
37  
38  
39  
40  
41  
42  
43  
44  
45  
46  
47  
48  
49  
50  
51  
52  
53  
54  
55  
56  
57  
58  
59  
60

**D All-cause mortality**

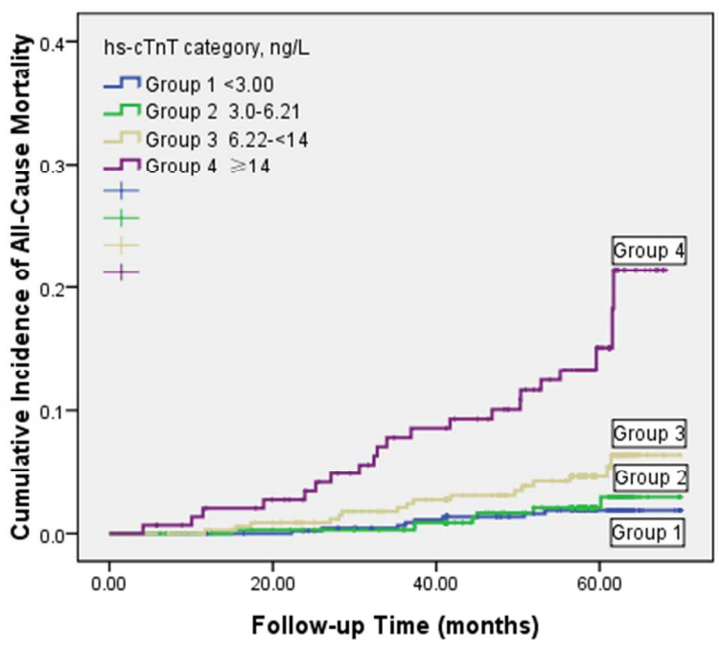

159x128mm (96 x 96 DPI)

For peer review only

# BMJ Open

## Association of High-Sensitivity Cardiac Troponin T with Mortality and Cardiovascular Events in a Community-Based Prospective Study in Beijing

|                                 |                                                                                                                                                                                                                                                                                                                                                        |
|---------------------------------|--------------------------------------------------------------------------------------------------------------------------------------------------------------------------------------------------------------------------------------------------------------------------------------------------------------------------------------------------------|
| Journal:                        | <i>BMJ Open</i>                                                                                                                                                                                                                                                                                                                                        |
| Manuscript ID                   | bmjopen-2016-013431.R1                                                                                                                                                                                                                                                                                                                                 |
| Article Type:                   | Research                                                                                                                                                                                                                                                                                                                                               |
| Date Submitted by the Author:   | 06-Jan-2017                                                                                                                                                                                                                                                                                                                                            |
| Complete List of Authors:       | Xiao, Wenkai<br>Cao, Ruihua; Chinese PLA General Hospital, Geriatric Cardiology<br>Liu, Yuan; Chinese PLA General Hospital, Geriatric Cardiology<br>Bai, Yongyi; Chinese PLA General Hospital, Geriatric Cardiology<br>Wu, Hongmei; Chinese PLA General Hospital, Geriatric Cardiology<br>Ye, Ping; Chinese PLA General Hospital, Geriatric Cardiology |
| <b>Primary Subject Heading</b>: | Cardiovascular medicine                                                                                                                                                                                                                                                                                                                                |
| Secondary Subject Heading:      | Epidemiology                                                                                                                                                                                                                                                                                                                                           |
| Keywords:                       | Biomarkers, Cardiac Epidemiology < CARDIOLOGY, risk assessment, prognosis                                                                                                                                                                                                                                                                              |
|                                 |                                                                                                                                                                                                                                                                                                                                                        |

SCHOLARONE™  
Manuscripts

1  
2  
3  
4  
5  
6  
7  
8  
9  
10  
11  
12  
13  
14  
15  
16  
17  
18  
19  
20  
21  
22  
23  
24  
25  
26  
27  
28  
29  
30  
31  
32  
33  
34  
35  
36  
37  
38  
39  
40  
41  
42  
43  
44  
45  
46  
47  
48  
49  
50  
51  
52  
53  
54  
55  
56  
57  
58  
59  
60

## Association of High-Sensitivity Cardiac Troponin T with Mortality and Cardiovascular Events in a Community-Based Prospective Study in Beijing

Wenkai Xiao, Ruihua Cao, Yuan Liu, Yongyi Bai, Hongmei Wu, Ping Ye \*

Department of Geriatric Cardiology, Chinese PLA General Hospital, No. 28, Fuxing Road, Beijing, 100853, China

Correspondence to Ping Ye, Department of Geriatric Cardiology, Chinese PLA General Hospital, Beijing, 100853, China

Tel:+86-10-66876369; Fax:+86-10-66876349; E-mail: [yeping301@sina.com](mailto:yeping301@sina.com)

**Keywords:** Biomarkers; High-sensitivity cardiac troponin T; cardiovascular diseases; prognosis; risk assessment.

**Word count:** 5860



## Abstract

**Objective:** The prognostic value of cardiac troponins in apparently healthy populations is not well established. The aim of this study is to investigate the prognostic properties of high-sensitivity cardiac troponin T (hs-cTnT) for long-term adverse outcomes.

**Setting:** A community-dwelling prospective survey of residents from two communities in Beijing.

**Participants:** From September 2007 to January 2009, 1680 participants were initially enrolled, of whom 1,499 (870 females, mean age 61.4 years) completed the survey and were followed up for a median of 4.8 years (interquartile range, 4.5-5.2).

**Outcome measures:** primary outcomes were the occurrence of all-cause mortality and major cardiovascular events.

**Results:** In total, 820 individuals (54.7%) had detectable hs-cTnT levels. During follow-up, 52 participants (3.5%) died, 154 (10.3%) had major cardiovascular events, and 99 (6.6%) experienced new-onset coronary events. Compared with participants with undetectable levels, those with hs-cTnT levels in the highest category ( $\geq 14$  ng/L) had significantly increased risk for all-cause mortality (adjusted hazard ratio [aHR] = 2.07; 95% confidence interval [CI], 1.05 to 3.01), major cardiovascular events (aHR = 3.27; 95% CI, 1.88 to 5.70), and coronary events (aHR = 4.50; 95% CI, 2.26 to 9.02) but not for stroke incident (aHR = 1.27; 95% CI, 0.69 to 2.62) in covariate-adjusted analyses. Also the significant associations were presented when hs-cTnT levels were modeled as a continuous variable and when analyzing changes over time in the

1  
2  
3  
4 hs-cTnT levels with adverse outcomes. Addition of troponin T levels to clinical  
5  
6 variables led to significant increases in risk prediction with significant improvement  
7  
8 of the c-statistic (P=0.003 or lower).  
9

10  
11 **Conclusions:** In this cohort of individuals from a community-based population,  
12  
13 cardiac troponin T measured with a highly sensitive assay was associated with  
14  
15 subsequent risk for all-cause mortality and major cardiovascular events, which might  
16  
17 support screening for at risk individuals.  
18  
19

### 20 21 22 23 24 25 26 **Strengths and limitations of this study** 27

- 28  
29 ■ Evaluating the prognostic properties of both baseline and change in hs-cTnT for  
30  
31 long-term adverse outcomes in a large community-dwelling study.  
32
- 33  
34 ■ Reliably detected minimal subclinical myocardial injury in an apparently healthy  
35  
36 population over a wide age range.  
37
- 38  
39 ■ Absence of echocardiographic and coronary artery imaging data and thus, could  
40  
41 not provide causal explanations on the associations between hs-cTnT and  
42  
43 outcomes.  
44  
45  
46  
47  
48  
49  
50  
51  
52  
53  
54  
55  
56  
57  
58  
59  
60

## Introduction

Cardiovascular disease (CVD) is still the primary cause of morbidity and mortality globally. There is concordant evidence that prevention is the key to lessening the CVD burden, but risk prediction of adverse cardiovascular events in low- to intermediate-risk individuals is a big challenge.<sup>1</sup> This subpopulation are at risk for developing CVD but are not identified early by current risk-factor screening methods.<sup>2-3</sup> Circulating biomarkers can be an important supplemental screening tool, and one of the most interesting biomarkers in this context is troponins. Cardiac troponin T (cTnT) is a regulatory protein expressed by cardiac myocytes and released in the setting of myocardial injury.<sup>4-5</sup> A sensitive and specific marker of cardiomyocytes damage, cTnT is typically used clinically in the earlier exclusion or confirmation of the diagnosis of acute myocardial infarction (AMI).

However, cTnT levels can also be elevated and clinically meaningful in the absence of myocardial ischemia. Detectable levels of cTnT can also be useful for detecting subclinical CVD and assessing CVD risk in the general population; however, cTnT is only detectable in a small percentage of the general population using standard assays,<sup>6-7</sup> which limit the utility for clinical applications. Recently, a highly sensitive cTnT (Hs-cTnT) assay has been developed, which can detect 10-fold lower concentrations than the standard fourth-generation assay. The introduction of this new assay has enabled detection of very low levels of circulating cTnT, even in some asymptomatic general population.<sup>8</sup>

cTnT levels below the detection limit of standard assays were independently

1  
2  
3 associated with adverse cardiovascular events in patients with heart failure (HF) <sup>9</sup> or  
4 stable coronary heart disease (CHD). <sup>10</sup> But the clinical significance of detectable  
5  
6  
7  
8  
9  
10  
11  
12  
13  
14  
15  
16  
17  
18  
19  
20  
21  
22  
23  
24  
25  
26  
27  
28  
29  
30  
31  
32  
33  
34  
35  
36  
37  
38  
39  
40  
41  
42  
43  
44  
45  
46  
47  
48  
49  
50  
51  
52  
53  
54  
55  
56  
57  
58  
59  
60

associated with adverse cardiovascular events in patients with heart failure (HF) <sup>9</sup> or stable coronary heart disease (CHD). <sup>10</sup> But the clinical significance of detectable cTnT with the use of the new assay in the apparently healthy population is not well established. The main objective of this study was to investigate the prognostic value of minimally detectable hs-cTnT levels in predicting adverse clinical events in a population of community-based subjects.

## Methods

### Study population

This is a prospective observational study of people living in the Pingguoyuan area of the Shijingshan district, a metropolitan area of Beijing, China. Initially, between September 2007 and January 2009, all permanent residents of Han origin aged 45 years or older (range 45~91 years) from two communities were invited to participate in a health survey that focused on identifying CVD risk factors. 31 subjects with bedridden status, mental illness, and severe systemic diseases were excluded from the enrollment. Then 1,832 participants were included and provided questionnaires. Of those, 152 participants with overt CVD (defined as a composite of CHD [myocardial infarction, angina pectoris, or coronary insufficiency], cerebrovascular disease [stroke or transient ischemic attack], congestive HF, or peripheral vascular disease) were excluded. Thus, adequate baseline measurements and cardiac biomarkers were obtained in 1680 participants. After the initial evaluation, recruited subjects were contacted every 2 years for follow-up, and the last follow-up visits were conducted through September 30, 2013. The median follow-up was 4.8

1  
2  
3  
4 (interquartile range 4.5-5.2) years. In our investigation, 181 participants were lost to  
5  
6 follow-up (supplementary Table 1 shows the clinical characteristics) and were  
7  
8 excluded from the study, complete data were acquired from 1499 participants (return  
9  
10 rate, 89.2%). All participants provided written informed consent at time of enrollment,  
11  
12 and the study was approved by the Ethics Committee of the Chinese People's  
13  
14 Liberation Army (PLA) General Hospital.  
15  
16

### 17 18 19 **Data collection**

20  
21 Baseline characteristics for this analysis were collected using self-reported  
22  
23 standardized questionnaires that included demographics, life-style information,  
24  
25 medical history, and medication use. Anthropometrical measurements were obtained  
26  
27 by trained medical doctors, and the body mass index (BMI) was derived from height  
28  
29 and weight measured with participants wearing light clothing and no shoes. Blood  
30  
31 pressures were measured two times on the right arm after 5 minutes of rest in a sitting  
32  
33 position, the mean of 2 readings were used for further analysis. Participants were  
34  
35 followed up for clinical outcomes by interview. Outcome measures were occurrences  
36  
37 of all-cause mortality and major adverse cardiovascular event (MACE), new events  
38  
39 were validated by obtaining medical records and adjudicated by 2 independent and  
40  
41 blinded reviewers. In our analyses, survival time was defined as the period from the  
42  
43 date of baseline blood sample collection to the date of the first adverse event or end of  
44  
45 follow-up.  
46  
47  
48  
49  
50  
51  
52

### 53 54 **Biomarker Assays**

55  
56 After at least 12 hours of overnight fasting, baseline blood samples were  
57  
58  
59  
60

1  
2  
3  
4 collected from participants between 8 AM and 10 AM at enrollment. Follow-up  
5  
6 measurements were performed on blood samples collected 4 to 5 years later. Serum  
7  
8 aliquots were frozen at -80°C until analysis in a central laboratory were performed.  
9  
10 Concentrations of blood glucose (fasting and 2 hours after an oral glucose tolerance),  
11  
12 total cholesterol (TC), triglycerides (TGs), high-density lipoprotein cholesterol  
13  
14 (HDL-C), low-density lipoprotein cholesterol (LDL-C), uric acid and serum  
15  
16 creatinine levels were measured by routine laboratory analysis.  
17  
18  
19

20  
21 Hs-cTnT were measured by an electrochemiluminescence immunoassay method  
22  
23 using an Elecsys Troponin T highly sensitive assay (Roche Diagnostics GmbH,  
24  
25 Mannheim, Germany) on the Modular Analytics E170 autoanalyzer (Roche  
26  
27 Diagnostics). The lower detection limit of the novel assay was 3 ng/L and a reported  
28  
29 99th percentile value in apparently healthy individuals was 14 ng/L.<sup>11</sup> N-terminal  
30  
31 pro-B-type natriuretic peptide (NT-proBNP) concentrations were determined using an  
32  
33 electrochemiluminescence immunoassay (Roche Diagnostics GmbH) on the Roche  
34  
35 analyzer. Levels of high-sensitivity C-reactive protein (hs-CRP) were measured with  
36  
37 the use of immunoturbidimetric assay (Siemens Healthcare Diagnostics, IN, USA) on  
38  
39 a Dimension RxL Max analyzer (Siemens Healthcare Diagnostics).  
40  
41  
42  
43  
44  
45

46 Estimated glomerular filtration rate (eGFR) was calculated using the Chinese  
47  
48 modifying Modification of Diet in Renal Disease (C-MDRD) equation, details of the  
49  
50 computing equation have been published elsewhere.<sup>12</sup>  
51  
52

### 53 54 **Definition of end points**

55  
56 For outcomes, we used the incidence of mortality and CVD morbidity after the  
57  
58  
59  
60

1  
2  
3  
4 baseline screening. All-cause mortality was determined by review of death certificates.  
5  
6 The definition of MACE comprised nonfatal MI, ischaemic heart disease (identified  
7  
8 by coronary artery imaging or receiving coronary revascularization), stroke  
9  
10 (ischaemic or haemorrhagic), and cardiovascular mortality. Major coronary events  
11  
12 were defined as nonfatal MI, ischaemic heart disease, and CHD death. Stroke was  
13  
14 characterized as a neurological deficit attributed to an acute focal injury of the central  
15  
16 nervous system by a vascular cause, including cerebral infarction, intracerebral  
17  
18 hemorrhage, and subarachnoid hemorrhage.<sup>13</sup> Cardiovascular mortality was defined  
19  
20 as mortality related to atherosclerotic heart disease (fatal MI and definite fatal CHD),  
21  
22 mortality following cerebrovascular disease, or mortality from other atherosclerotic  
23  
24 and CVD including HF. Nonfatal MI was defined by the American Heart Association  
25  
26 diagnostic criteria.<sup>14</sup>  
27  
28  
29  
30  
31  
32

### 33 **Statistical analysis**

34  
35  
36 Continuous variables are reported as mean  $\pm$  standard deviation (SD) or median  
37  
38 (interquartile range) and categorical variables as count and percentages. We modeled  
39  
40 hs-cTnT as both a categorical and a continuous variable. For the analyses of hs-cTnT  
41  
42 as a categorical variable, we divided participants into 4 categories: those with  
43  
44 undetectable hs-cTnT were placed in the first category as the reference group; those  
45  
46 with hs-cTnT levels greater than or equal to the previously reported 99th percentile  
47  
48 value (14 ng/L)[11] were placed in the fourth category, and those with levels between  
49  
50 3 and 14 ng/L were divided into two groups for categories 2 and 3 based on the  
51  
52 median value of hs-cTnT. Demographic and clinical variables were compared across  
53  
54  
55  
56  
57  
58  
59  
60

1  
2  
3  
4 hs-cTnT categories using the one-way analysis of variance tests for continuous  
5  
6 measures, Cuzik's nonparametric trend test for nonnormally distributed variables, and  
7  
8 chi-squared tests were performed for categorical variables.  
9

10  
11 Cumulative incidence of MACE and all-cause mortality for each category of  
12  
13 hs-cTnT concentration was evaluated using the Kaplan-Meier method and compared  
14  
15 with the log-rank test. Multivariable Cox proportional hazards regression models  
16  
17 were used to analyze associations of hs-cTnT categories with outcomes with category  
18  
19 1 used as the referent. The models were incrementally adjusting for demographics,  
20  
21 traditional cardiovascular risk factors, renal function and other biomarkers (Hs-CRP  
22  
23 and NT-proBNP) levels. We also carried an exploratory analysis in which we regarded  
24  
25 cTnT as a continuous variable and assessed the relationship between natural logarithm  
26  
27 transformed hs-cTnT values and end points. In this analysis, values of cTnT that were  
28  
29 below the lower limit of detection were assigned to 1.5 ng/L (i.e., one-half of the  
30  
31 lower limit of detection).  
32  
33  
34  
35  
36  
37  
38

39 In view of the markedly skewed distribution of cTnT, changes in concentrations  
40  
41 over time were calculated as the difference between the natural logarithm of the  
42  
43 concentrations at follow-up and at baseline. The association between changes in  
44  
45 hs-cTnT levels and outcomes were also evaluated in Cox proportional hazards models.  
46  
47 The change in hs-cTnT levels was entered as a continuous variable and adjusted for  
48  
49 baseline concentration of hs-cTnT and for the relevant variables described previously  
50  
51 in multivariable models.  
52  
53  
54

55  
56 The discriminative capacity of a model with and without cTnT was estimated as  
57  
58  
59  
60



1  
2  
3  
4 C-statistics. The area under the receiver operating characteristic curve summarized the  
5  
6 diagnostic discrimination. All data were analyzed using the SPSS statistical package  
7  
8 software (version 17.0). A two-sided value of  $P < 0.05$  was considered statistically  
9  
10 significant.

## 11 12 13 **Results**

### 14 15 **Participant Characteristics**

16  
17 For the present analyses, 1499 participants were included. The mean ( $\pm$ SD)  
18  
19 age of participants at enrollment was  $61.4 \pm 11.4$  years and 58.0% were women. cTnT  
20  
21 was detectable at baseline in 820 individuals (54.7%) and was equal to or higher than  
22  
23 14 ng/L in 172 participants (11.5%), the detectable cTnT levels ranged from 3 to  
24  
25 176.4 ng/L. Table 1 shows baseline characteristics by hs-cTnT categories. Compared  
26  
27 with those with lower cTnT levels, individuals with higher levels were older, were  
28  
29 more likely to be male, more frequently hypertensive and diabetic, had lower eGFR  
30  
31 and HDL-C levels, and had higher uric acid, NT-proBNP levels. In cardiovascular  
32  
33 drug use, use of antihypertensive, antidiabetic, and aspirin varied across levels of  
34  
35 hs-cTnT.  
36  
37  
38  
39  
40  
41  
42

### 43 44 **Outcomes by Baseline Hs-cTnT Level**

45  
46 Over a median follow-up period of 4.8 years (interquartile range, 4.5-5.2), 154  
47  
48 participants experienced new-onset MACE (including 99 coronary events and 61  
49  
50 strokes, some participants had more than one event ) and 52 deaths occurred from any  
51  
52 cause. The cumulative incidence of MACE and all-cause mortality by hs-cTnT  
53  
54 categories are shown in Figure 1. As demonstrated by the Kaplan-Meier survival  
55  
56  
57  
58  
59  
60

1  
2  
3 analysis, there was a graded increase in the probability of adverse clinical events  
4  
5  
6 across the categories. The unadjusted incidence rate for MACE ranged from 3.7% in  
7  
8  
9 those participants with undetectable hs-cTnT levels to 23.3% for subjects in the  
10  
11 highest category (P<0.001, log-rank test). Similar trends were discovered for coronary  
12  
13 events, stroke, and all-cause mortality, with a particularly high risk was found for  
14  
15 those in the highest category.  
16  
17  
18  
19  
20  
21  
22  
23  
24  
25  
26  
27  
28  
29  
30  
31  
32  
33  
34  
35  
36  
37  
38  
39  
40  
41  
42  
43  
44  
45  
46  
47  
48  
49  
50  
51  
52  
53  
54  
55  
56  
57  
58  
59  
60

**Table1. Characteristics of Study Population by Baseline high-sensitivity troponin T Levels**

| Characteristics          | Hs-cTNT Group (ng/L)        |                               |                               |                         | P value<br>for Trend |
|--------------------------|-----------------------------|-------------------------------|-------------------------------|-------------------------|----------------------|
|                          | Group 1<br><3.00 (n = 679 ) | Group 2<br>3.00-6.21 (n=324 ) | Group 3<br>6.22-<14 (n= 324 ) | Group4<br>≥14 (n = 172) |                      |
| Demographic              |                             |                               |                               |                         |                      |
| Age ( years)             | 58.6±10.3                   | 63.1±10.7                     | 64.2±12.4                     | 61.8±11.5               | <0.001               |
| Male Sex n (%)           | 202 (29.7)                  | 163 (50.3)                    | 170 (52.5)                    | 94 (54.7)               | <0.001               |
| BMI (kg/m <sup>2</sup> ) | 25.5±3.5                    | 25.7±3.2                      | 25.6±3.3                      | 25.8±3.5                | 0.498                |
| Medical history          |                             |                               |                               |                         |                      |
| Hypertension n (%)       | 258 (38.0)                  | 159 (49.1)                    | 176 (54.3)                    | 97 (56.4)               | <0.001               |
| Diabetes mellitus n (%)  | 99 (14.6)                   | 72 (22.2)                     | 76 (23.5)                     | 45 (26.2)               | <0.001               |
| Current smoking n (%)    | 85 (12.5)                   | 69 (21.3)                     | 62 (19.1)                     | 31(18.0)                | 0.003                |
| Systolic BP (mm Hg)      | 131.5±16.5                  | 132.7±17.3                    | 132.8±17.2                    | 133.2±17.1              | 0.041                |
| Diastolic BP (mm Hg)     | 77.1±9.7                    | 77.3±10.0                     | 76.4±10.5                     | 76.1±11.1               | 0.372                |
| Laboratory values        |                             |                               |                               |                         |                      |
| FBG (mmol/L)             | 5.3±1.4                     | 5.3±1.5                       | 5.5±1.7                       | 5.8±1.9                 | 0.076                |
| PBG (mmol/L)             | 7.5±3.7                     | 7.1±3.2                       | 8.1±4.3                       | 8.9±4.4                 | <0.001               |

|                                   |                   |                   |                   |                  |        |
|-----------------------------------|-------------------|-------------------|-------------------|------------------|--------|
| Total cholesterol (mmol/L)        | 5.1±0.9           | 5.1±0.9           | 5.1±0.9           | 5.0±0.9          | 0.464  |
| Triglycerides (mmol/L)            | 1.8±1.1           | 1.7±1.1           | 1.7±1.0           | 2.0±1.4          | 0.04   |
| LDL cholesterol (mmol/L)          | 3.0±0.7           | 2.9±0.7           | 3.0±0.7           | 3.0±0.7          | 0.136  |
| HDL cholesterol (mmol/L)          | 1.4±0.4           | 1.4±0.3           | 1.3±0.4           | 1.3±0.4          | 0.001  |
| Uric acid (µmol/L)                | 279.0±68.2        | 295.9±73.3        | 301.2±75.4        | 309.5±76.2       | <0.001 |
| eGFR (mL/min/1.73m <sup>2</sup> ) | 90.1±14.5         | 88.7±13.4         | 87.5±15.2         | 84.7±16.5        | 0.001  |
| NT-proBNP (pg/mL)                 | 37.2 (17.9, 75.3) | 38.9 (17.9, 74.4) | 46.6 (22.3, 90.1) | 49.3 (17.1, 112) | 0.003  |
| Hs-CRP (mg/L)                     | 2.4 (1.3, 3.4)    | 2.3 (1.4, 3.4)    | 2.2 (1.5, 3.5)    | 2.4 (1.6, 3.6)   | 0.383  |
| Medication use                    |                   |                   |                   |                  |        |
| Antihypertensives n (%)           | 187 (27.5)        | 122 (37.7)        | 139 (42.9)        | 80 (46.5)        | <0.001 |
| Antidiabetic n (%)                | 64 (9.4)          | 44 (13.6)         | 52 (16.0)         | 29 (16.9)        | 0.0028 |
| Lipid lowering n (%)              | 109 (16.1)        | 61 (18.8)         | 58 (17.9)         | 34 (19.8)        | 0.149  |
| Aspirin n (%)                     | 137 (20.2)        | 79 (24.4)         | 89 (27.5)         | 55 (31.9)        | <0.001 |

Values are reported as n (%), mean ± SD, or median (interquartile range). BMI=body mass index; BP=blood pressure; eGFR =estimated glomerular filtration rate; FBG=fasting blood glucose;

HDL= high-density lipoprotein; Hs-CRP = high-sensitivity C-reactive protein; LDL = low-density-lipoprotein; PBG= postprandial blood glucose; NT-proBNP = N-terminal pro-type B

natriuretic peptide.

## Associations of Baseline hs-cTnT Levels With MACE and All-Cause Mortality

In a series of Cox proportional hazards models adjusting for age and gender (model 1) and further adjusting for traditional cardiovascular risk factors (model 2), higher hs-cTnT categories demonstrated a graded association with MACE. Only modest attenuation of the hazards was found with further adjustment for renal function (model 3). Although significant attenuation was discovered with additional adjustment for hs-CRP and NT-proBNP level (model 4), hs-cTnT levels in the third category (hazard ratio [HR], 2.31 [95% CI, 1.39-3.84]) and fourth category (HR, 3.27 [95% CI, 1.88-5.70]) remained independently associated with MACE in the fully adjusted models. Participants in hs-cTnT categories 3 and 4 also had a significantly higher risk of coronary events compared with participants with undetectable levels (HRs of 2.76 [95% CI, 1.44-5.31] and 4.50 [95% CI, 2.26 - 9.02], respectively, in model 4, Table2). However, associations of hs-cTnT levels with stroke incidents were markedly attenuated and no longer significant after adjusting for NT-proBNP (model 4, Table2). Not only in the univariate Cox regression analysis but also in multivariate models, membership in the highest hs-cTnT category was independently associated with the all-cause mortality risk (HR 2.07, [95% CI, 1.05-3.01]).

In an exploratory research of hs-cTnT as a continuous variable after natural logarithm transformation, we found a continuous association with MACE incident (per one-ln unit increment; HR, 1.67; 95% CI, 1.04–2.68;  $P < 0.001$ ), with coronary events (HR, 1.68; 95% CI, 1.35–2.08;  $P < 0.001$ ) and with all-cause mortality (HR,

1.50; 95% CI, 1.26–1.79; P=0.003) in the fully multivariate models including variables described in Table 2. The association between cTnT as a continuous variable and stroke risk was not found in the final adjusted models (HR, 1.06; 95% CI, 0.87 – 1.32; P=0.17).

**Table 2. Cox Proportional Hazards Models Analysis for Associations Between Baseline Hs-cTnT Levels and Outcomes**

|                     | Hazard Ratio (95% Confidence Interval) |                          |                          |                     |
|---------------------|----------------------------------------|--------------------------|--------------------------|---------------------|
|                     | Group 1<br><3.00 ng/L                  | Group 2<br>3.0-6.21 ng/L | Group 3<br>6.22-<14 ng/L | Group 4<br>≥14 ng/L |
| No.                 | 679                                    | 324                      | 324                      | 172                 |
| MACE                | n=25 (3.7%)                            | n=30 (9.3%)              | n=59 (18.2%)             | n=40 (23.3%)        |
| Model 1             | 1[Reference]                           | 1.65 (0.97-2.81)         | 2.65 (1.64-4.27)         | 4.20 (2.51-7.02)    |
| Model 2             | 1[Reference]                           | 1.52 (0.89-2.59)         | 2.41 (1.48-3.91)         | 3.82 (2.27-6.43)    |
| Model 3             | 1[Reference]                           | 1.52 (0.89-2.61)         | 2.38 (1.47-3.88)         | 3.79 (2.26-6.39)    |
| Model 4             | 1[Reference]                           | 1.68 (0.97-2.92)         | 2.31 (1.39-3.84)         | 3.27 (1.88-5.70)    |
| Coronary event      | n=14 (2.1%)                            | n=17 (5.3%)              | n=41 (12.7%)             | n=27 (15.7%)        |
| Model 1             | 1[Reference]                           | 1.69 (0.83-3.44)         | 3.39 (1.82-6.29)         | 5.23 (2.7-10.14)    |
| Model 2             | 1[Reference]                           | 1.61 (0.78-3.29)         | 3.25 (1.74-6.07)         | 5.5 (2.84-10.64)    |
| Model 3             | 1[Reference]                           | 1.57 (0.76-3.22)         | 3.09 (1.65-5.79)         | 5.14 (2.65-9.98)    |
| Model 4             | 1[Reference]                           | 1.42 (0.71-2.89)         | 2.76 (1.44-5.31)         | 4.50 (2.26-9.02)    |
| Stroke event        | n=11 (1.6%)                            | n=13 (4.0%)              | n=20 (6.2%)              | n=17 (9.9%)         |
| Model 1             | 1[Reference]                           | 1.59 (0.71-3.57)         | 1.94 (0.91-4.14)         | 3.84 (1.75-8.43)    |
| Model 2             | 1[Reference]                           | 1.47 (0.65-3.29)         | 1.77 (0.83-3.79)         | 3.19 (1.42-7.16)    |
| Model 3             | 1[Reference]                           | 1.47 (0.65-3.31)         | 1.70 (0.79-3.66)         | 3.16 (1.41-7.10)    |
| Model 4             | 1[Reference]                           | 1.03 (0.50-2.09)         | 1.13 (0.57-2.14)         | 1.27 (0.69-2.62)    |
| All-cause mortality | n=8 (1.2%)                             | n=7 (2.2%)               | n=16 (4.9%)              | n=21 (12.2%)        |
| Model 1             | 1[Reference]                           | 1.13 (0.41-3.14)         | 1.99 (0.83-4.76)         | 6.14 (2.61-14.46)   |

|         |              |                  |                  |                   |
|---------|--------------|------------------|------------------|-------------------|
| Model 2 | 1[Reference] | 1.13 (0.41-3.14) | 1.78 (0.73-4.35) | 4.87 (1.99-11.88) |
| Model 3 | 1[Reference] | 1.14 (0.41-3.16) | 1.79 (0.73-4.38) | 4.87 (1.99-11.88) |
| Model 4 | 1[Reference] | 1.01 (0.40-1.15) | 1.09 (0.43-2.76) | 2.07 (1.05-3.01)  |

Abbreviations: MACE, major adverse cardiovascular event.

Models are defined as follows: model 1=adjusted for age and gender; model 2=adjusted for model 1+ presence of hypertension or diabetes mellitus, smoking status (current vs not), systolic blood pressure, postprandial blood glucose, total cholesterol, high-density lipoprotein cholesterol, antihypertensive medication use, and antidiabetic medication use; model 3= adjusted for model 2+estimated glomerular filtration rate; model 4= adjusted for model 3+ high-sensitivity C-reactive protein and N-terminal pro-B-type natriuretic peptide (both ln transformed).

## Changes in hs-cTnT Concentration During Follow-up and Subsequent Events

Table 3 presents the results of Cox regression analysis for subsequent events in relation to changes in hs-cTnT concentration as a continuous variable. Changes in hs-cTnT concentration were strongly associated with subsequent events except for stroke, even in multivariable analyses that additionally adjusted for baseline hs-cTnT levels. In the fully adjusted models, the HR for MACE for every unit increasing in hs-cTnT concentration was 1.35 (95% CI: 1.08-1.68,  $p=0.008$ ), as well as coronary event (HR: 1.44, 95% CI: 1.17-1.77,  $p=0.001$ ). Likewise, an increase in hs-cTnT concentration was not so remarkably associated with incident stroke (HR: 1.02, 95% CI: 0.64-2.19,  $p=0.242$ ).

**Table 3. Association of Changes in hs-cTnT Concentrations With Subsequent Events**

|      | Multivariable adjusted HR | 95% CI    | p Value |
|------|---------------------------|-----------|---------|
| MACE | 1.35                      | 1.08-1.68 | 0.008   |

|                |      |           |       |
|----------------|------|-----------|-------|
| Coronary event | 1.44 | 1.17-1.77 | 0.001 |
| Stroke event   | 1.02 | 0.64-2.19 | 0.242 |

Abbreviations: HR, hazard ratio; CI, confidence interval; MACE, major adverse cardiovascular event. Data are presented as hazard ratio and 95% confidence intervals for a 1-unit increase of changes in hs-cTnT on a log scale.

Multivariable adjusted model adjusted for the covariates listed in Table 2 Model 4 plus baseline hs-cTnT level.

### Hs-cTnT and Risk Prediction

Hs-cTnT provided incremental prognostic information regarding the three endpoints when added to a model based on established risk indicators (Table 4). The addition of hs-cTnT increased the c-statistic from 0.671 to 0.698 (P=0.003) for the prediction of all-cause mortality and improved prediction of MACE from 0.702 to 0.734 (P<0.001).

**Table 4. Discrimination for adverse outcomes with the addition of hs-cTnT to clinical risk factor model.**

| Endpoint            | c-statistic (95%CI) |                          | p Value |
|---------------------|---------------------|--------------------------|---------|
|                     | Clinical Model      | Clinical Model + hs-cTnT |         |
| All-cause mortality | 0.671 (0.646-0.704) | 0.698 (0.680-0.725)      | P=0.003 |
| MACE                | 0.702 (0.680-0.726) | 0.734 (0.714-0.758)      | <0.001  |
| Coronary event      | 0.713 (0.701-0.735) | 0.749 (0.729-0.768)      | <0.001  |
| Stroke event        | 0.683 (0.665-0.709) | 0.697 (0.674-0.729)      | P=0.09  |

Clinical risk factor model include age, gender, body mass index, current smoking, diabetes mellitus, systolic blood pressure, diastolic blood pressure, total cholesterol, high-density lipoprotein cholesterol, estimated glomerular filtration rate.



## Discussion

The main purpose of the current study was to evaluate the usefulness of high-sensitivity cardiac troponin T measurement for prediction of major cardiovascular events and all-cause mortality in a community-based study of general population. Several valuable findings emerged from our study. First, we used the up-to-date generation of cTnT assay, allowing us to reliably detect minimal subclinical myocardial injury in some individuals of a general population covering a wide age range, without restricting the study to morbid or high-risk individuals. Second, the baseline and kinetic changes of hs-cTnT concentration were powerful and independent predictors of long term MACE and all-cause mortality. Finally, these risk predictions were persistent even after adjustment for traditional cardiovascular risk factors as well as adjustment for biomarkers of inflammation and cardiac wall strain.

Cardiac troponins are generally the preferred biomarkers of myocardial necrosis, typically in the diagnosis of acute coronary syndromes, but the recently available hs-cTnT assay has allowed detection of much lower concentrations of circulating cTnT. More recent observations have showed that with this new assay, very low levels of circulating cTnT can be detectable and can provide information about the coronary plaque characteristics and mortality in patients with stable CHD;<sup>15-16</sup> and that very low levels of circulating cTnT can even be detected in the general population.<sup>17-18</sup> The exact mechanisms of troponins release in apparently healthy individuals are not well clarified. One possibility is the existence of asymptomatic cardiac ischemia with minimal myocardial injury resulting in troponins release

1  
2  
3 without any symptoms.<sup>19</sup> Other mechanisms include cardiomyocyte apoptosis,<sup>20</sup>  
4  
5 physiological cell turnover,<sup>21</sup> or subclinical cardiac structural or functional  
6  
7 abnormalities.<sup>22-23</sup>  
8  
9

10  
11 More recently, although the prognostic implications of hs-cTnT assays among  
12  
13 apparently healthy individuals have been explored in three large cohort studies,<sup>18, 24-25</sup>  
14  
15 all the studies are of middle-aged to elderly general populations from western  
16  
17 countries. Now our study extends the findings to Asians and demonstrates the  
18  
19 significance of hs-cTnT assay in risk assessment. To the best of our knowledge, this is  
20  
21 the first study to evaluate the potential utility of hs-cTnT assay in a Chinese  
22  
23 population. One important finding is the observation that the presence of an elevated  
24  
25 hs-cTnT level (in the highest category) was associated with adverse outcomes  
26  
27 regarding all-cause mortality and MACE. However, the associations of minimally  
28  
29 detectable hs-cTnT levels (especially those below 6.2ng/L, in the second category)  
30  
31 with death or MACE were not present in comparison to the undetected group. It has  
32  
33 been proposed that such levels may be physiological, reflecting normal myocardial  
34  
35 cell turnover and apoptosis within the senescent heart tissue,<sup>26</sup> or cortisol response to  
36  
37 mental stress in healthy adults.<sup>27</sup> Further research is required into which hs-cTnT  
38  
39 threshold value may best be used in risk prediction.  
40  
41  
42  
43  
44  
45  
46  
47

48  
49 While other biomarkers such as hs-CRP and NT-proBNP have been used to  
50  
51 identify apparently healthy individuals who are at increased CVD risk,<sup>28-29</sup> our  
52  
53 investigation indicates that hs-cTnT is also independent of these biomarkers. In this  
54  
55 cohort, although associations with death and cardiovascular events were significantly  
56  
57  
58  
59  
60

1  
2  
3  
4 attenuated after additional adjustment for levels of NT-proBNP, hs-cTnT remained  
5  
6 independently predictive of end points in the final model, suggesting that the two  
7  
8 biomarkers convey slightly different information for cardiac structural and functional  
9  
10 abnormalities. The hazard ratios remained statistically significant after adjusting for  
11  
12 traditional cardiovascular risk factors and renal function, consistent with results from  
13  
14 other studies.<sup>8,30</sup> All these data indicate that very low levels of cTnT may identify  
15  
16 subclinical myocardial injury and lead to cardiovascular events risk not fully  
17  
18 estimated by current risk assessment methods. Also, associations of hs-cTnT level  
19  
20 with all-cause mortality and MACE were consistent in stratification analysis defined  
21  
22 by sex.  
23  
24  
25  
26  
27

28  
29 Our data also suggest that even minimal changes in low levels of cTnT have  
30  
31 prognostic characteristics and can help to identify individuals at long-term risk for  
32  
33 adverse events. There seems to be a dose-dependent relationship between increased  
34  
35 hs-cTnT and increased risk. Consistently with our results, DeFilippi et al,<sup>24</sup> have  
36  
37 reported that changes in cTnT concentrations determined with a highly sensitive assay  
38  
39 were significantly associated with incident HF and cardiovascular death in community  
40  
41 -based older adults. Also, in a prospective cohort of ambulatory older adults, a strong  
42  
43 increase in the risk of sudden cardiac death<sup>31</sup> and incident atrial fibrillation<sup>32</sup> was  
44  
45 associated with changes over time in hs-cTnT concentrations. Although these changes  
46  
47 may reflect normal physiological variation, their relation to future adverse events  
48  
49 regardless of baseline hs-cTnT levels indicates that they may really represent dynamic  
50  
51 changes in risk stratification.  
52  
53  
54  
55  
56  
57  
58  
59  
60

1  
2  
3  
4 In contrast to the strong associations with mortality and MACE, hs-cTnT  
5  
6 concentration was not associated with stroke occurrence after adjustment for multiple  
7  
8 variables. There are several potential explanations for this finding. First, cardiac  
9  
10 troponin specially reflects myocardial necrosis or subclinical myocardial injury. Some  
11  
12 previous studies indicate that structural heart abnormalities are more powerful  
13  
14 determinants of myocardial injury among participants in the general population than  
15  
16 coronary atherosclerosis.<sup>33-34</sup> Second, the Atherosclerosis Risk in Communities  
17  
18 (ARIC) Study<sup>35</sup> showed that elevated plasma hs-cTnT levels were associated with  
19  
20 increased risk of non-lacunar ischemic strokes, and especially cardioembolic stroke,  
21  
22 but not with hemorrhagic stroke in the general population. Epidemiological data has  
23  
24 demonstrated that there are differences in incidence rates of stroke subtypes between  
25  
26 Chinese and western populations. Intracerebral hemorrhage (ICH) accounts for only  
27  
28 10-15% of strokes in most western populations,<sup>36</sup> whereas up to 55% of strokes in the  
29  
30 Chinese population are ICH.<sup>37</sup> Although analysis for likely ischemic stroke as an end  
31  
32 point had also been carried out (data not shown), the number of ischemic cause was  
33  
34 less than one half of all strokes, and it was impossible to obtain an evident difference  
35  
36 in the results.  
37  
38  
39  
40  
41  
42  
43  
44

45  
46 Our study also has several limitations. First, cardiovascular treatment has  
47  
48 changed over time and it is possible that more prevalent use of medicines such as  
49  
50 statins and antiplatelet drugs could have lowered the predictive value of hs-cTnT.  
51  
52  
53 Second, we lack echocardiographic and coronary artery imaging data and thus, can  
54  
55 not provide causal explanations for the associations between hs-cTnT level , cardiac  
56  
57  
58  
59  
60

1  
2  
3  
4 abnormalities, and outcomes. Third, the incidence rate of adverse events was  
5  
6 relatively low in this cohort and hs-cTnT were detected in a considerable proportion,  
7  
8 which limits its potential for long-term predictive usefulness. Finally, the study  
9  
10 population was restricted to Chinese Han origin inhabitant. Therefore, extrapolation of  
11  
12 our results to other demographic groups should be done with caution. The predictive  
13  
14 value of hs-cTnT needs to be further validated in other observational studies.  
15  
16  
17  
18

## 19 **Conclusion**

20  
21 In this prospective cohort of community-dwelling population, we found both  
22  
23 baseline and changes in cardiac troponin T detected by a highly sensitive assay were  
24  
25 independently associated with adverse outcomes. The results suggest that cTnT may  
26  
27 be an important biomarker in the prediction of mortality and cardiovascular events in  
28  
29 apparently healthy individuals. Further investigations therefore are warranted to  
30  
31 elucidate mechanisms for cTnT release in these individuals and to test whether active  
32  
33 interventions can reduce the associated risk contributed by elevated troponin levels.  
34  
35  
36  
37  
38  
39  
40

41 **Contributorship statement:** The manuscript has been read and approved by all  
42  
43 of the authors. All authors contributed to the intellectual development of this paper.

44  
45 Conceived and designed the experiments: Ping Ye. Performed the experiments:

46  
47 Wenkai Xiao, Yuan Liu. Analyzed the data: Wenkai Xiao and Yongyi Bai. Wrote the  
48  
49 manuscript: Wenkai Xiao. Supervised data collection: Rui Cao, Hongmei Wu.  
50  
51

52  
53 **Competing Interests:** The authors have declared that no competing interests  
54  
55 exist.  
56  
57  
58  
59  
60

1  
2  
3  
4 **Funding:** This study was supported by grants from the Key National Basic  
5  
6 Research Program of China (2012CB517503, 2013CB530804) and the Key Science  
7  
8 and Technology Foundation of China (2012ZX09303004-002) to P Ye.  
9

10  
11 **Data sharing statement:** The additional unpublished data from the study are  
12  
13 available. We can share the original data for this research article.  
14

15  
16 **Acknowledgements** We thank our colleagues at the Department of Laboratory  
17  
18 Medicine of the PLA General Hospital for their help with biochemical measurements.  
19  
20 We are also grateful to all study participants for their rigorous work.  
21  
22  
23  
24  
25

## 26 **References**

- 27  
28  
29 1. Khot UN, Khot MB, Bajzer CT, et al. Prevalence of conventional risk factors in  
30  
31 patients with coronary heart disease. *JAMA* 2003;290:898-904.  
32  
33  
34 2. Melander O, Newton-Cheh C, Almgren P, et al. Novel and conventional  
35  
36 biomarkers for prediction of incident cardiovascular events in the community. *JAMA*  
37  
38 2009;302:49-57.  
39  
40  
41 3. Blankenberg S, Zeller T, Saarela O, et al. Contribution of 30 biomarkers to 10-year  
42  
43 cardiovascular risk estimation in 2 population cohorts: the MONICA, Risk, Genetics,  
44  
45 Archiving, and Monograph (MORGAM) biomarker project. *Circulation* 2010;121:  
46  
47 2388-97.  
48  
49  
50  
51 4. Thygesen K, Mair J, Katus H, et al. Recommendations for the use of cardiac  
52  
53 troponin measurement in acute cardiac care. *Eur Heart J* 2010;31: 2197–204.  
54  
55  
56  
57 5. Bandstein N, Ljung R, Johansson M, et al. Undetectable High-Sensitivity Cardiac  
58  
59  
60

1  
2  
3  
4 Troponin T Level in the Emergency Department and Risk of Myocardial Infarction. *J*

5  
6  
7 *Am Coll Cardiol* 2014;63:2569-78.

8  
9  
10  
11 6. Zethelius B, Berglund L, Sundstrom J, et al. Use of multiple biomarkers to improve  
12 the prediction of death from cardiovascular causes. *N Engl J Med* 2008;358: 2107–16.

13  
14  
15  
16  
17  
18  
19 7. Daniels LB, Laughlin GA, Clopton P, et al. Minimally elevated cardiac troponin T  
20 and elevated N-terminal pro-B-type natriuretic peptide predict mortality in older  
21 adults: results from the Rancho Bernardo Study. *J Am Coll Cardiol* 2008;52:450–9.

22  
23  
24  
25  
26  
27  
28 8. Eggers KM, Al-Shakarchi J, Berglund L, et al. High-sensitive cardiac troponin T  
29 and its relations to cardiovascular risk factors, morbidity, and mortality in elderly men.  
30  
31  
32  
33  
34  
35  
36  
37  
38  
39  
40  
41  
42  
43  
44  
45  
46  
47  
48  
49  
50  
51  
52  
53  
54  
55  
56  
57  
58  
59  
60  
*Am Heart J* 2013;166:541-8.

9. Masson S, Anand I, Favero C, et al. Serial Measurement of Cardiac Troponin T  
Using a Highly Sensitive Assay in Patients With Chronic Heart Failure. *Circulation*  
2012;125:280-8.

10. Beatty AL, Ku IA, Christenson RH, et al. High-sensitivity cardiac troponin T and  
secondary events in outpatients with coronary heart disease from the Heart and Soul  
Study. *JAMA Intern Med* 2013;173:763–9.

11. Giannitsis E, Kurz K, Hallermayer K, et al. Analytical validation of a high-  
sensitivity cardiac troponin T assay. *Clin Chem* 2010;56:254-261.

12. Ma YC, Zuo L, Chen JH, et al. Modified glomerular filtration rate estimating  
equation for chinese patients with chronic kidney disease. *J Am Soc Nephrol* 2006; 17:  
2937-44.

13. Sacco RL, Kasner SE, Broderick JP, et al. An updated definition of stroke for

1  
2  
3  
4 the 21st century: statement for healthcare professionals from the American  
5  
6 Heart Association/American Stroke Association. *Stroke* 2013;44:2064-89.

7  
8  
9 14. Luepker RV, Apple FS, Christenson RH, et al. Case definitions for acute coronary  
10  
11 heart disease in epidemiology and clinical research studies. *Circulation* 2003;108:  
12  
13 2543-9.

14  
15  
16 15. Oemrawsingh RM, Cheng JM, García-García HM, et al. High-sensitivity  
17  
18 Troponin T in relation to coronary plaque characteristics in patients with stable  
19  
20 coronary artery disease; results of the ATHEROREMO-IVUS study. *Atherosclerosis*  
21  
22 2016;247:135-41.

23  
24  
25  
26 16. Giannitsis E, Spanuth E, Horsch A, et al. High-sensitivity cardiac troponin T and  
27  
28 N-terminal pro-B-type natriuretic peptide predict mortality in stable coronary artery  
29  
30 disease: results from the Ludwigshafen Risk and Cardiovascular Health (LURIC)  
31  
32 study. *Clin Chem Lab Med* 2013;51:2019-28.

33  
34  
35  
36 17. Rubin J, Matsushita K, Lazo M, et al. Determinants of minimal elevation  
37  
38 in high-sensitivity cardiac troponin T in the general population. *Clin Biochem* 2016;  
39  
40 49:657-62.

41  
42  
43  
44 18. Saunders JT, Nambi V, de Lemos JA, et al. Cardiac troponin T measured by a  
45  
46 highly sensitive assay predicts coronary heart disease, heart failure, and mortality in  
47  
48 the Atherosclerosis Risk in Communities Study. *Circulation* 2011;123:1367-76.

49  
50  
51 19. Turer AT, Addo TA, Martin JL, et al. Myocardial ischemia induced by rapid atrial  
52  
53 pacing causes troponin T release detectable by a highly sensitive assay: insights from  
54  
55 a coronary sinus sampling study. *J Am Coll Cardiol* 2011;57:2398-405.



- 1  
2  
3  
4 20. White HD. Pathobiology of troponin elevations: do elevations occur with  
5  
6 myocardial ischemia as well as necrosis? *J Am Coll Cardiol* 2011;57:2406-8.  
7  
8  
9 21. Røsjø H, Andreassen J, Edvardsen T, et al. Prognostic usefulness of circulating  
10  
11 high-sensitivity troponin T in aortic stenosis and relation to echocardiographic  
12  
13 indexes of cardiac function and anatomy. *Am J Cardiol* 2011;108:88-91.  
14  
15  
16 22. Kawasaki T, Sakai C, Harimoto K, et al. Usefulness of High-Sensitivity Cardiac  
17  
18 Troponin T and Brain Natriuretic Peptide as Biomarkers of Myocardial Fibrosis in  
19  
20 Patients With Hypertrophic Cardiomyopathy. *Am J Cardiol* 2013;112:867-72.  
21  
22  
23 23. Ravassa S, Kuznetsova T, Varo N, et al. Biomarkers of cardiomyocyte injury and  
24  
25 stress identify left atrial and left ventricular remodelling and dysfunction: A  
26  
27 population-based study. *Int J Cardiol* 2015;185:177-85.  
28  
29  
30 24. deFilippi CR, de Lemos JA, Christenson RH, et al. Association of serial measures  
31  
32 of cardiac troponin T using a sensitive assay with incident heart failure and  
33  
34 cardiovascular mortality in older adults. *JAMA* 2010;304:2494-502.  
35  
36  
37 25. de Lemos JA, Drazner MH, Omland T, et al. Association of troponin T detected  
38  
39 with a highly sensitive assay and cardiac structure and mortality risk in the general  
40  
41 population. *JAMA* 2010;304:2503-12.  
42  
43  
44 26. Sze J, Mooney J, Barzi F, et al. Cardiac Troponin and its Relationship to  
45  
46 Cardiovascular Outcomes in Community Populations – A Systematic Review and  
47  
48 Meta-analysis. *Heart Lung Circ* 2016;25:217-28.  
49  
50  
51 27. Lazzarino AI, Hamer M, Gaze D, et al. The association between cortisol response  
52  
53 to mental stress and high-sensitivity cardiac troponin T plasma concentration in  
54  
55  
56  
57  
58  
59  
60

1  
2  
3  
4 healthy adults. *J Am Coll Cardiol* 2013; 62:1694-701.

5  
6 28. Schnell-Inderst P, Schwarzer R, Göhler A, et al. Prognostic value, clinical  
7  
8 effectiveness, and cost-effectiveness of high - sensitivity C-reactive protein as a  
9  
10 marker for major cardiac events in asymptomatic individuals: a health technology  
11  
12 assessment report. *Int J Technol Assess Health Care* 2010; 26:30-9.

13  
14 29. Daniels LB, Clopton P, deFilippi CR, et al. Serial measurement of N- terminal  
15  
16 pro-B-type natriuretic peptide and cardiac troponin T for cardiovascular disease risk as  
17  
18 assessment in the Multi-Ethnic Study of Atherosclerosis (MESA). *Am Heart J* 2015;  
19  
20 170:1170-83.

21  
22 30. Scheven L, de Jong PE, Hillege HL, et al. High-sensitive troponin T and N-  
23  
24 terminal pro -B type natriuretic peptide are associated with cardiovascular events  
25  
26 despite the cross- sectional association with albuminuria and glomerular filtration rate.  
27  
28  
29  
30  
31  
32  
33  
34  
35  
36  
37  
38  
39  
40  
41  
42  
43  
44  
45  
46  
47  
48  
49  
50  
51  
52  
53  
54  
55  
56  
57  
58  
59  
60  
*Eur Heart J* 2012; 33:2272-81.

36  
37 31. Hussein AA, Gottdiener JS, Bartz TM, et al. Cardiomyocyte injury assessed by  
38  
39 a highly sensitive troponin assay and sudden cardiac death in the community: the  
40  
41 Cardiovascular Health Study. *J Am Coll Cardiol* 2013;62:2112-20.

42  
43 32. Hussein AA, Bartz TM, Gottdiener JS, et al. Serial measures of cardiac troponin  
44  
45 T levels by a highly sensitive assay and incident atrial fibrillation in a prospective  
46  
47 cohort of ambulatory older adults. *Heart Rhythm* 2015;12:879-85.

48  
49 33. Masson S, Latini R, Mureddu GF, et al. High-sensitivity cardiac troponin T for  
50  
51 detection of subtle abnormalities of cardiac phenotype in a general population of  
52  
53 elderly individuals. *J Intern Med* 2013;273:306-17.

- 1  
2  
3  
4 34. de Lemos JA, deFilippi CR. Prevalence and significance of detectable troponins as  
5  
6 measured by highly sensitive assays in the general population. *Coronary Artery*  
7  
8 *Disease* 2013;24:705-9.  
9  
10  
11 35. Folsom AR, Nambi V, Bell EJ, et al. Troponin T, N-Terminal Pro-B-Type  
12  
13 Natriuretic Peptide, and Incidence of Stroke. The Atherosclerosis Risk in  
14  
15 Communities Study. *Stroke* 2013; 44:961-7.  
16  
17  
18 36. Lloyd-Jones D, Adams R, Carnethon M, et al. Heart disease and stroke  
19  
20 statistics-2009 update: a report from the American Heart Association Statistics  
21  
22 Committee and Stroke Statistics Subcommittee. *Circulation* 2009;119:480-6.  
23  
24  
25 37. Yang QD, Niu Q, Zhou YH, et al. Incidence of cerebral hemorrhage in the  
26  
27 Changsha community. A prospective study from 1986 to 2000. *Cerebrovasc Dis.*  
28  
29 2004;17:303-13.  
30  
31  
32  
33  
34  
35  
36  
37  
38  
39  
40  
41  
42  
43  
44  
45  
46  
47  
48  
49  
50  
51  
52  
53  
54  
55  
56  
57  
58  
59  
60

1  
2  
3  
4  
5  
6  
7  
8  
9  
10  
11  
12  
13  
14  
15  
16  
17  
18  
19  
20  
21  
22  
23  
24  
25  
26  
27  
28  
29  
30  
31  
32  
33  
34  
35  
36  
37  
38  
39  
40  
41  
42  
43  
44  
45  
46  
47  
48  
49  
50  
51  
52  
53  
54  
55  
56  
57  
58  
59  
60

### A Major adverse cardiovascular events

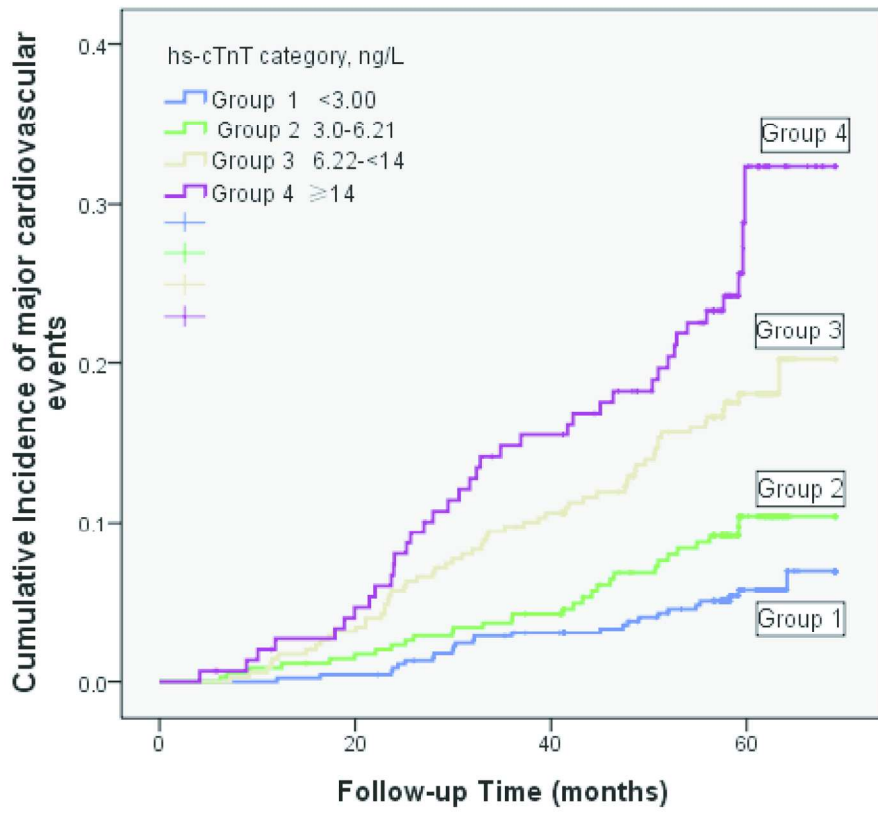

| No. at risk |     |     |     |     |
|-------------|-----|-----|-----|-----|
| Group 1     | 679 | 676 | 649 | 344 |
| Group 2     | 324 | 318 | 307 | 103 |
| Group 3     | 324 | 311 | 285 | 105 |
| Group 4     | 172 | 161 | 140 | 45  |

95x106mm (600 x 600 DPI)

**B Coronary event**

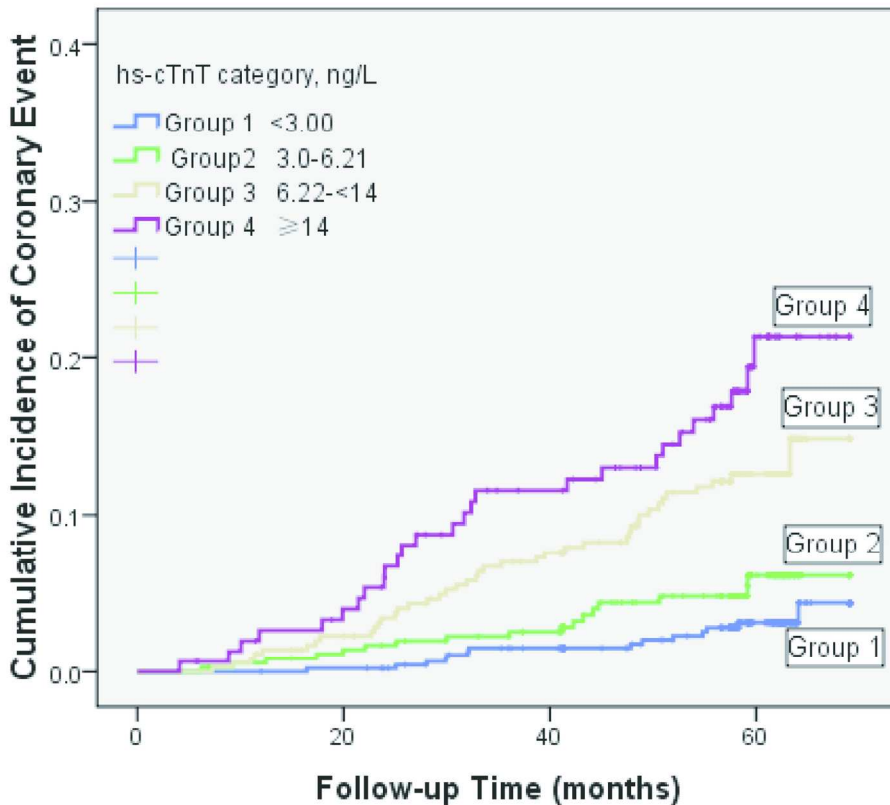

No. at risk

|         |     |     |     |     |
|---------|-----|-----|-----|-----|
| Group 1 | 679 | 676 | 649 | 344 |
| Group 2 | 324 | 318 | 307 | 103 |
| Group 3 | 324 | 311 | 285 | 105 |
| Group 4 | 172 | 161 | 140 | 45  |

84x98mm (600 x 600 DPI)

### C Stroke

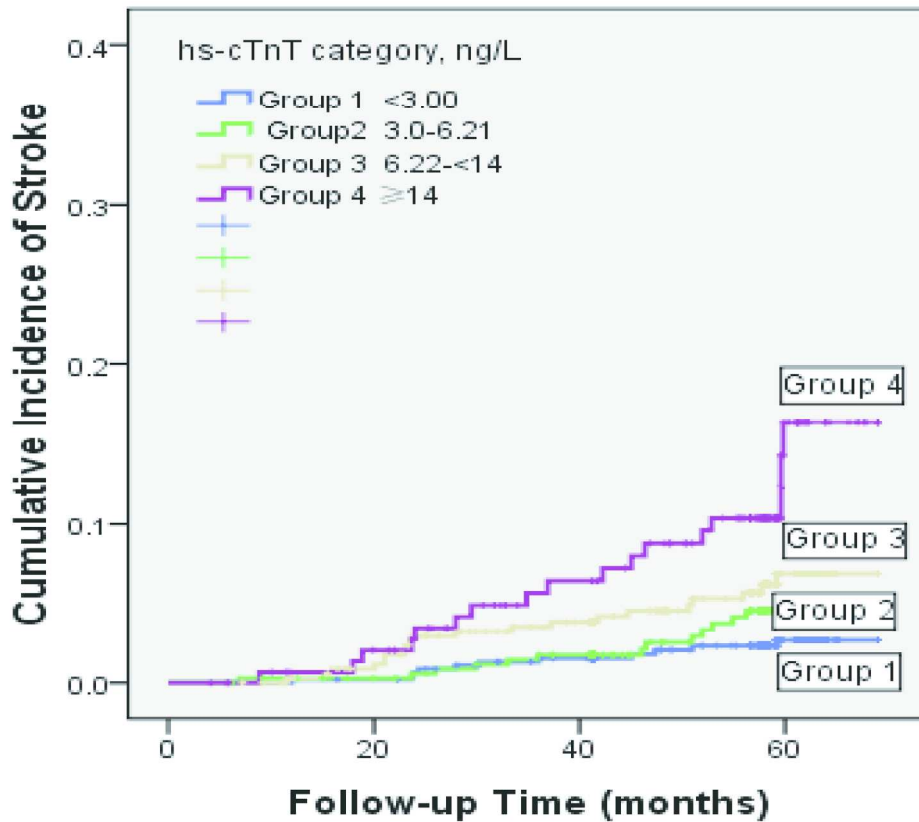

| No. at risk | 0   | 20  | 40  | 60  |
|-------------|-----|-----|-----|-----|
| Group 1     | 679 | 676 | 649 | 344 |
| Group 2     | 324 | 318 | 307 | 103 |
| Group 3     | 324 | 311 | 285 | 105 |
| Group 4     | 172 | 161 | 140 | 45  |

99x114mm (600 x 600 DPI)

1  
2  
3  
4  
5  
6  
7  
8  
9  
10  
11  
12  
13  
14  
15  
16  
17  
18  
19  
20  
21  
22  
23  
24  
25  
26  
27  
28  
29  
30  
31  
32  
33  
34  
35  
36  
37  
38  
39  
40  
41  
42  
43  
44  
45  
46  
47  
48  
49  
50  
51  
52  
53  
54  
55  
56  
57  
58  
59  
60

**D All-cause mortality**

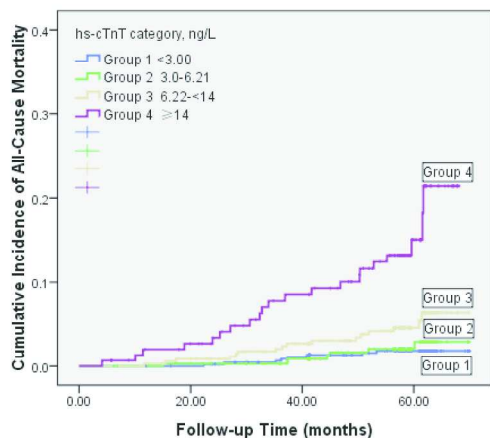

| No. at risk |     |     |     |     |
|-------------|-----|-----|-----|-----|
| Group 1     | 679 | 674 | 649 | 344 |
| Group 2     | 324 | 318 | 307 | 103 |
| Group 3     | 324 | 311 | 285 | 105 |
| Group 4     | 172 | 161 | 140 | 45  |

**Figure1. Risk for Cardiovascular Events and All-Cause Mortality by Baseline hs-cTnT Level**  
Kaplan-Meier survival curves indicating cumulative incidence of MACE (A), Coronary event (B), Stroke (C) and All-cause mortality (D) across baseline hs-cTnT categories. Groups are indicated by colors, P<0.001 for all between-group comparisons by the log-rank test.

113x89mm (600 x 600 DPI)

**Supplementary Table1. Characteristics of Study Population between the follow up and lost groups**

| Characteristics                   | Baseline population         |                                    | P value |
|-----------------------------------|-----------------------------|------------------------------------|---------|
|                                   | Follow up group<br>(n=1499) | lost to follow up group<br>(n=181) |         |
| <b>Demographic</b>                |                             |                                    |         |
| Age ( years)                      | 61.4±11.4                   | 57.6±10.5                          | <0.01   |
| Male Sex n (%)                    | 629 (42.0)                  | 83(45.9)                           | 0.316   |
| BMI (kg/m <sup>2</sup> )          | 25.6±3.3                    | 25.8±3.4                           | 0.273   |
| <b>Medical history</b>            |                             |                                    |         |
| Hypertension n (%)                | 690(46.0)                   | 72(39.8)                           | 0.111   |
| Diabetes mellitus n (%)           | 292(19.5)                   | 30(16.6)                           | 0.348   |
| Current smoking n (%)             | 247(16.5)                   | 35(19.3)                           | 0.331   |
| Systolic BP (mm Hg)               | 132.7±17.0                  | 130.6±16.7                         | 0.136   |
| Diastolic BP (mm Hg)              | 76.6±10.3                   | 77.8±10.7                          | 0.077   |
| <b>Laboratory values</b>          |                             |                                    |         |
| FBG (mmol/L)                      | 5.4±1.6                     | 5.3±1.5                            | 0.474   |
| PBG (mmol/L)                      | 8.0±4.2                     | 7.5±3.7                            | <0.05   |
| Total cholesterol (mmol/L)        | 5.1±0.9                     | 5.0±0.9                            | 0.321   |
| Triglycerides (mmol/L)            | 1.8±1.2                     | 1.9±1.1                            | 0.054   |
| LDL cholesterol (mmol/L)          | 3.0±0.7                     | 2.9±0.6                            | 0.21    |
| HDL cholesterol (mmol/L)          | 1.4±0.3                     | 1.4±0.3                            | 0.386   |
| Uric acid (μmol/L)                | 291.4±73.3                  | 276.9±70.8                         | <0.01   |
| eGFR (mL/min/1.73m <sup>2</sup> ) | 88.9±15.5                   | 92.1±16.0                          | 0.009   |
| NT-proBNP (pg/mL)                 | 41.7(19.8,81.9)             | 37.4(17.3,73.9)                    | <0.01   |
| Hs-CRP (mg/L)                     | 2.3 (1.4, 3.5)              | 2.2 (1.3, 3.4)                     | 0.189   |
| <b>Medication use</b>             |                             |                                    |         |
| Antihypertensives n (%)           | 528 (35.2)                  | 55 (30.4)                          | 0.197   |
| Antidiabetic n (%)                | 189 (12.6)                  | 19 (10.5)                          | 0.415   |



|                |       |            |           |       |
|----------------|-------|------------|-----------|-------|
| Lipid lowering | n (%) | 262 (17.5) | 29(16.0)  | 0.625 |
| Aspirin        | n (%) | 360 (24.0) | 37 (20.4) | 0.285 |

---

For peer review only

STROBE Statement—checklist of items that should be included in reports of observational studies

|                              | Item No. | Recommendation                                                                                                                                                                             | Page No. | Relevant text from manuscript |
|------------------------------|----------|--------------------------------------------------------------------------------------------------------------------------------------------------------------------------------------------|----------|-------------------------------|
| <b>Title and abstract</b>    | 1        | (a) Indicate the study’s design with a commonly used term in the title or the abstract                                                                                                     | 1        |                               |
|                              |          | (b) Provide in the abstract an informative and balanced summary of what was done and what was found                                                                                        | 2        |                               |
| <b>Introduction</b>          |          |                                                                                                                                                                                            |          |                               |
| Background/rationale         | 2        | Explain the scientific background and rationale for the investigation being reported                                                                                                       | 4        |                               |
| Objectives                   | 3        | State specific objectives, including any prespecified hypotheses                                                                                                                           | 5        |                               |
| <b>Methods</b>               |          |                                                                                                                                                                                            |          |                               |
| Study design                 | 4        | Present key elements of study design early in the paper                                                                                                                                    | 5        |                               |
| Setting                      | 5        | Describe the setting, locations, and relevant dates, including periods of recruitment, exposure, follow-up, and data collection                                                            | 5-6      |                               |
| Participants                 | 6        | (a) <i>Cohort study</i> —Give the eligibility criteria, and the sources and methods of selection of participants. Describe methods of follow-up                                            | 5-6      |                               |
|                              |          | <i>Case-control study</i> —Give the eligibility criteria, and the sources and methods of case ascertainment and control selection. Give the rationale for the choice of cases and controls |          |                               |
|                              |          | <i>Cross-sectional study</i> —Give the eligibility criteria, and the sources and methods of selection of participants                                                                      |          |                               |
|                              |          | (b) <i>Cohort study</i> —For matched studies, give matching criteria and number of exposed and unexposed                                                                                   |          |                               |
|                              |          | <i>Case-control study</i> —For matched studies, give matching criteria and the number of controls per case                                                                                 |          |                               |
| Variables                    | 7        | Clearly define all outcomes, exposures, predictors, potential confounders, and effect modifiers. Give diagnostic criteria, if applicable                                                   | 8        |                               |
| Data sources/<br>measurement | 8*       | For each variable of interest, give sources of data and details of methods of assessment (measurement). Describe comparability of assessment methods if there is more than one group       | 6-7      |                               |
| Bias                         | 9        | Describe any efforts to address potential sources of bias                                                                                                                                  |          |                               |
| Study size                   | 10       | Explain how the study size was arrived at                                                                                                                                                  |          |                               |

Continued on next page

|                        |     |                                                                                                                                                                                                                                                                                                           |       |
|------------------------|-----|-----------------------------------------------------------------------------------------------------------------------------------------------------------------------------------------------------------------------------------------------------------------------------------------------------------|-------|
| Quantitative variables | 11  | Explain how quantitative variables were handled in the analyses. If applicable, describe which groupings were chosen and why                                                                                                                                                                              |       |
| Statistical methods    | 12  | (a) Describe all statistical methods, including those used to control for confounding                                                                                                                                                                                                                     | 8     |
|                        |     | (b) Describe any methods used to examine subgroups and interactions                                                                                                                                                                                                                                       | 8     |
|                        |     | (c) Explain how missing data were addressed                                                                                                                                                                                                                                                               | 8-9   |
|                        |     | (d) <i>Cohort study</i> —If applicable, explain how loss to follow-up was addressed<br><i>Case-control study</i> —If applicable, explain how matching of cases and controls was addressed<br><i>Cross-sectional study</i> —If applicable, describe analytical methods taking account of sampling strategy |       |
|                        |     | (e) Describe any sensitivity analyses                                                                                                                                                                                                                                                                     | 9     |
| <b>Results</b>         |     |                                                                                                                                                                                                                                                                                                           |       |
| Participants           | 13* | (a) Report numbers of individuals at each stage of study—eg numbers potentially eligible, examined for eligibility, confirmed eligible, included in the study, completing follow-up, and analysed                                                                                                         | 10    |
|                        |     | (b) Give reasons for non-participation at each stage                                                                                                                                                                                                                                                      |       |
|                        |     | (c) Consider use of a flow diagram                                                                                                                                                                                                                                                                        |       |
| Descriptive data       | 14* | (a) Give characteristics of study participants (eg demographic, clinical, social) and information on exposures and potential confounders                                                                                                                                                                  | 12-13 |
|                        |     | (b) Indicate number of participants with missing data for each variable of interest                                                                                                                                                                                                                       |       |
|                        |     | (c) <i>Cohort study</i> —Summarise follow-up time (eg, average and total amount)                                                                                                                                                                                                                          | 10    |
| Outcome data           | 15* | <i>Cohort study</i> —Report numbers of outcome events or summary measures over time                                                                                                                                                                                                                       | 10    |
|                        |     | <i>Case-control study</i> —Report numbers in each exposure category, or summary measures of exposure                                                                                                                                                                                                      |       |
|                        |     | <i>Cross-sectional study</i> —Report numbers of outcome events or summary measures                                                                                                                                                                                                                        |       |
| Main results           | 16  | (a) Give unadjusted estimates and, if applicable, confounder-adjusted estimates and their precision (eg, 95% confidence interval). Make clear which confounders were adjusted for and why they were included                                                                                              | 14-16 |
|                        |     | (b) Report category boundaries when continuous variables were categorized                                                                                                                                                                                                                                 | 15    |
|                        |     | (c) If relevant, consider translating estimates of relative risk into absolute risk for a meaningful time period                                                                                                                                                                                          |       |

Continued on next page

|                          |    |                                                                                                                                                                            |    |
|--------------------------|----|----------------------------------------------------------------------------------------------------------------------------------------------------------------------------|----|
| Other analyses           | 17 | Report other analyses done—eg analyses of subgroups and interactions, and sensitivity analyses                                                                             | 17 |
| <b>Discussion</b>        |    |                                                                                                                                                                            |    |
| Key results              | 18 | Summarise key results with reference to study objectives                                                                                                                   | 18 |
| Limitations              | 19 | Discuss limitations of the study, taking into account sources of potential bias or imprecision. Discuss both direction and magnitude of any potential bias                 | 21 |
| Interpretation           | 20 | Give a cautious overall interpretation of results considering objectives, limitations, multiplicity of analyses, results from similar studies, and other relevant evidence | 22 |
| Generalisability         | 21 | Discuss the generalisability (external validity) of the study results                                                                                                      |    |
| <b>Other information</b> |    |                                                                                                                                                                            |    |
| Funding                  | 22 | Give the source of funding and the role of the funders for the present study and, if applicable, for the original study on which the present article is based              | 23 |

\*Give information separately for cases and controls in case-control studies and, if applicable, for exposed and unexposed groups in cohort and cross-sectional studies.

**Note:** An Explanation and Elaboration article discusses each checklist item and gives methodological background and published examples of transparent reporting. The STROBE checklist is best used in conjunction with this article (freely available on the Web sites of PLoS Medicine at <http://www.plosmedicine.org/>, Annals of Internal Medicine at <http://www.annals.org/>, and Epidemiology at <http://www.epidem.com/>). Information on the STROBE Initiative is available at [www.strobe-statement.org](http://www.strobe-statement.org).

1  
2  
3  
4  
5  
6  
7  
8  
9  
10  
11  
12  
13  
14  
15  
16  
17  
18  
19  
20  
21  
22  
23  
24  
25  
26  
27  
28  
29  
30  
31  
32  
33  
34  
35  
36  
37  
38  
39  
40  
41  
42  
43  
44  
45  
46  
47  
48  
49

# BMJ Open

## Association of High-Sensitivity Cardiac Troponin T with Mortality and Cardiovascular Events in a Community-Based Prospective Study in Beijing

|                                 |                                                                                                                                                                                                                                                                                                                                                                                                                         |
|---------------------------------|-------------------------------------------------------------------------------------------------------------------------------------------------------------------------------------------------------------------------------------------------------------------------------------------------------------------------------------------------------------------------------------------------------------------------|
| Journal:                        | <i>BMJ Open</i>                                                                                                                                                                                                                                                                                                                                                                                                         |
| Manuscript ID                   | bmjopen-2016-013431.R2                                                                                                                                                                                                                                                                                                                                                                                                  |
| Article Type:                   | Research                                                                                                                                                                                                                                                                                                                                                                                                                |
| Date Submitted by the Author:   | 24-Feb-2017                                                                                                                                                                                                                                                                                                                                                                                                             |
| Complete List of Authors:       | Xiao, Wenkai<br>Cao, Ruihua; Chinese PLA General Hospital, Geriatric Cardiology<br>Liu, Yuan; Chinese PLA General Hospital, Geriatric Cardiology<br>Wang, Fan; Chinese PLA General Hospital, Geriatric Cardiology<br>Bai, Yongyi; Chinese PLA General Hospital, Geriatric Cardiology<br>Wu, Hongmei; Chinese PLA General Hospital, Geriatric Cardiology<br>Ye, Ping; Chinese PLA General Hospital, Geriatric Cardiology |
| <b>Primary Subject Heading</b>: | Cardiovascular medicine                                                                                                                                                                                                                                                                                                                                                                                                 |
| Secondary Subject Heading:      | Epidemiology                                                                                                                                                                                                                                                                                                                                                                                                            |
| Keywords:                       | Biomarkers, Cardiac Epidemiology < CARDIOLOGY, risk assessment, prognosis                                                                                                                                                                                                                                                                                                                                               |
|                                 |                                                                                                                                                                                                                                                                                                                                                                                                                         |

SCHOLARONE™  
Manuscripts

1  
2  
3  
4 **Association of High-Sensitivity Cardiac Troponin T with Mortality**  
5  
6 **and Cardiovascular Events in a Community-Based Prospective Study**  
7  
8 **in Beijing**  
9

10  
11  
12  
13  
14 Wenkai Xiao, Ruihua Cao, Yuan Liu, Fan Wang, Yongyi Bai, Hongmei Wu, Ping Ye\*

15  
16 Department of Geriatric Cardiology, Chinese PLA General Hospital, No. 28, Fuxing  
17  
18 Road, Beijing, 100853, China  
19

20  
21 Correspondence to Ping Ye, Department of Geriatric Cardiology, Chinese PLA  
22  
23 General Hospital, Beijing, 100853, China  
24

25  
26 Tel:+86-10-66876369; Fax:+86-10-66876349; E-mail: [yeping301@sina.com](mailto:yeping301@sina.com)  
27

28  
29 **Keywords:** Biomarkers; High-sensitivity cardiac troponin T; Cardiovascular diseases;  
30  
31 Prognosis; Risk assessment.  
32

33  
34 **Word count:** 5860  
35  
36  
37  
38  
39  
40  
41  
42  
43  
44  
45  
46  
47  
48  
49  
50  
51  
52  
53  
54  
55  
56  
57  
58  
59  
60

## Abstract

**Objective:** The prognostic value of cardiac troponins in apparently healthy populations is not well established. The aim of this study was to investigate the prognostic properties of high-sensitivity cardiac troponin T (hs-cTnT) for long-term adverse outcomes.

**Setting:** A community-dwelling prospective survey of residents from two communities in Beijing.

**Participants:** From September 2007 to January 2009, 1680 participants were initially enrolled. Of these, 1499 (870 females, mean age: 61.4 years) participants completed the survey and were followed up for a median of 4.8 years (interquartile range: 4.5–5.2).

**Outcome measures:** The primary outcome was the occurrence of all-cause mortality and major cardiovascular events.

**Results:** Overall, 820 individuals (54.7%) had detectable hs-cTnT levels. During the follow-up, 52 participants (3.5%) died, 154 (10.3%) had major cardiovascular events, and 99 (6.6%) experienced new-onset coronary events. Compared with those with undetectable hs-cTnT levels, participants with hs-cTnT levels in the highest category ( $\geq 14$  ng/L) had a significantly increased risk for all-cause mortality (adjusted hazard ratio [aHR] : 2.07, 95% confidence interval [CI]: 1.05–3.01), major cardiovascular events (aHR: 3.27, 95% CI: 1.88–5.70), and coronary events (aHR: 4.50, 95% CI: 2.26–9.02) in covariate-adjusted analyses. No differences in stroke incidence were found (aHR: 1.27; 95% CI: 0.69–2.62). Also, significant associations

1  
2  
3  
4 were presented when hs-cTnT levels were modelled as a continuous variable and  
5  
6 when analysing changes in hs-cTnT levels over time with adverse outcomes. The  
7  
8 addition of troponin T levels to clinical variables led to significant increases in risk  
9  
10 prediction with a marked improvement in the c-statistic (P=0.003 or lower).  
11  
12

13  
14 **Conclusions:** In this cohort of individuals from a community-based population,  
15  
16 cardiac troponin T levels measured with a highly sensitive assay were associated with  
17  
18 increases in the subsequent risk for all-cause mortality and major cardiovascular  
19  
20 events. These results might support screening for at-risk individuals.  
21  
22  
23  
24  
25  
26  
27  
28

### 29 **Strengths and limitations of this study**

- 30  
31 ■ Evaluating the prognostic properties of both baseline hs-cTnT and change in  
32  
33 hs-cTnT for long-term adverse outcomes in a large community-dwelling study.  
34  
35
- 36  
37 ■ Reliably detecting minimal subclinical myocardial injury in an apparently healthy  
38  
39 population over a wide age range.  
40
- 41  
42 ■ Due to the lack of echocardiographic and coronary artery imaging data, no causal  
43  
44 explanations on the associations between hs-cTnT and outcomes could be  
45  
46 provided.  
47  
48  
49  
50  
51  
52  
53  
54  
55  
56  
57  
58  
59  
60



## Introduction

Cardiovascular disease (CVD) is still the primary cause of morbidity and mortality worldwide. There is concordant evidence that prevention is the key to lessening the CVD burden, but predicting the risk of adverse cardiovascular events in low- to intermediate-risk individuals is a considerable challenge.<sup>1</sup> This subpopulation is at risk for developing CVD but is not identified during the early stages by current risk screening methods.<sup>2-3</sup> Circulating biomarkers can be an important supplemental screening tool, and troponins are one of the most interesting biomarkers in this context. Cardiac troponin T (cTnT) is a regulatory protein that is expressed by cardiac myocytes and is released in the setting of myocardial injury.<sup>4-5</sup> As a sensitive and specific marker of cardiomyocyte damage, cTnT is typically used to exclude or confirm the diagnosis of acute myocardial infarction in the clinical setting.

However, cTnT levels can also be elevated and clinically meaningful in the absence of myocardial ischaemia. Detectable levels of cTnT can also be useful for detecting subclinical CVD and assessing CVD risk in the general population. However, the use of cTnT for clinical applications is limited, as it is only detectable in a small percentage of the general population using standard assays.<sup>6-7</sup> Recently, a highly sensitive cTnT (Hs-cTnT) assay has been developed, which can detect concentrations that are 10-fold lower than those detectable with the standard fourth-generation assay. The introduction of this new assay has enabled the detection of very low levels of circulating cTnT, even in an asymptomatic general population.<sup>8</sup>

Levels of cTnT, below the detection limit of standard assays, have been shown to

1  
2  
3  
4 be independently associated with adverse cardiovascular events in patients with heart  
5  
6 failure (HF) <sup>9</sup> or stable coronary heart disease (CHD). <sup>10</sup> However, the clinical  
7  
8 significance of detectable cTnT with the use of the new assay in the apparently  
9  
10 healthy population has not been well established. The main objective of this study was  
11  
12 to investigate the prognostic value of minimally detectable hs-cTnT levels in  
13  
14 predicting adverse clinical events in a population of community-based subjects.  
15  
16  
17

## 18 19 **Methods**

### 20 21 **Study population**

22  
23 This was a prospective observational study of people living in the Pingguoyuan  
24  
25 area of the Shijingshan district, which is a metropolitan area of Beijing, China.  
26  
27  
28 Between September 2007 and January 2009, all permanent residents of the Han origin,  
29  
30 aged 45 years or older (range 45–91 years), from two communities, were invited to  
31  
32 participate in a health survey that focused on identifying CVD risk factors. Thirty-one  
33  
34 subjects with bedridden status, mental illness, and severe systemic diseases were  
35  
36 excluded from enrolment. Then, 1832 participants were included and asked to  
37  
38 complete questionnaires. Of these, 152 participants with overt CVD (defined as a  
39  
40 composite of CHD [myocardial infarction, angina pectoris, or coronary insufficiency],  
41  
42 cerebrovascular disease [stroke or transient ischaemic attack], congestive HF, or  
43  
44 peripheral vascular disease) were excluded. Adequate baseline measurements and  
45  
46 cardiac biomarkers were obtained in 1680 participants. After the initial evaluation, the  
47  
48 recruited subjects were contacted every 2 years for follow-up, and the last follow-up  
49  
50 visits were conducted through September 30, 2013. The median follow-up was 4.8  
51  
52  
53  
54  
55  
56  
57  
58  
59  
60

1  
2  
3  
4 (interquartile range: 4.5–5.2) years. In our investigation, 181 participants were lost to  
5  
6 follow-up (Supplementary Table 1) and were excluded from the study. Complete data  
7  
8 were acquired from 1499 participants (return rate: 89.2%). All participants provided  
9  
10 written informed consent at the time of enrolment, and the study was approved by the  
11  
12 Ethics Committee of the Chinese People’s Liberation Army General Hospital.  
13  
14

## 15 16 **Data collection**

17  
18 Baseline characteristics were collected using self-reported standardized  
19  
20 questionnaires that included demographics, life-style information, medical history,  
21  
22 and medication use. Anthropometrical measurements were obtained by trained  
23  
24 medical doctors, and the body mass index (BMI) was derived from heights and  
25  
26 weights that were measured in participants wearing light clothing and no shoes. Blood  
27  
28 pressures were measured twice on the right arm after 5 minutes of rest in a sitting  
29  
30 position, and the mean of two readings was used for further analysis. Participants  
31  
32 were followed up for clinical outcomes by interview. Outcome measures were the  
33  
34 occurrences of all-cause mortality and major adverse cardiovascular events (MACE).  
35  
36 New events were validated by obtaining medical records and adjudicated by two  
37  
38 independent and blinded reviewers. In the analyses, survival time was defined as the  
39  
40 period from the date of baseline blood sample collection to the date of the first  
41  
42 adverse event or end of follow-up.  
43  
44  
45  
46  
47  
48  
49

## 50 51 **Biomarker assays**

52  
53 At the time of enrolment, baseline blood samples were collected from  
54  
55 participants between 8 AM and 10 AM after at least 12 hours of overnight fasting.  
56  
57  
58  
59  
60

1  
2  
3  
4 Follow-up measurements were performed on blood samples, which were collected 4  
5  
6 to 5 years later. Serum aliquots were frozen at -80°C until further analyses in a central  
7  
8 laboratory. Concentrations of blood glucose (fasting and 2 hours after an oral glucose  
9  
10 tolerance), total cholesterol (TC), triglycerides (TGs), high-density lipoprotein  
11  
12 cholesterol (HDL-C), low-density lipoprotein cholesterol (LDL-C), uric acid, and  
13  
14 serum creatinine were measured by routine laboratory analysis.  
15  
16  
17

18  
19 Hs-cTnT levels were measured by an electrochemiluminescence immunoassay  
20  
21 method using an Elecsys Troponin T highly sensitive assay (Roche Diagnostics  
22  
23 GmbH, Mannheim, Germany) on the Modular Analytics E170 autoanalyser (Roche  
24  
25 Diagnostics). The lower detection limit of the novel assay was 3 ng/L, and the 99th  
26  
27 percentile value in apparently healthy individuals has been reported to be 14 ng/L.<sup>11</sup>  
28  
29 N-terminal pro-B-type natriuretic peptide (NT-proBNP) concentrations were  
30  
31 determined using an electrochemiluminescence immunoassay (Roche Diagnostics  
32  
33 GmbH) on the Roche analyser. Levels of high-sensitivity C-reactive protein (hs-CRP)  
34  
35 were measured with the use of an immunoturbidimetric assay (Siemens Healthcare  
36  
37 Diagnostics, IN, USA) on a Dimension RxL Max analyser (Siemens Healthcare  
38  
39 Diagnostics).  
40  
41  
42  
43  
44  
45

46  
47 Estimated glomerular filtration rate (eGFR) was calculated using the Chinese  
48  
49 Modification of Diet in Renal Disease equation. Details of the computing equation  
50  
51 have been published elsewhere.<sup>12</sup>  
52  
53

## 54 **Definition of end points**

55

56  
57 For outcomes, we used the incidence of mortality and CVD morbidity after the  
58  
59  
60

1  
2  
3  
4 baseline screening. All-cause mortality was determined by review of death certificates.

5  
6 The definition of MACE comprised nonfatal myocardial infarction, newly diagnosed  
7  
8 CHD (identified by coronary artery imaging or receiving coronary revascularization),  
9  
10 stroke (ischaemic or haemorrhagic), and cardiovascular mortality. Major coronary  
11  
12 events were defined as nonfatal myocardial infarction, newly diagnosed CHD, and  
13  
14 CHD death. Stroke was characterized as a neurological deficit attributed to an acute  
15  
16 focal injury of the central nervous system by a vascular cause, including cerebral  
17  
18 infarction, intracerebral haemorrhage, and subarachnoid hemorrhage.<sup>13</sup>

19  
20 Cardiovascular mortality was defined as mortality related to atherosclerotic heart  
21  
22 disease (fatal myocardial infarction and definite fatal CHD), mortality following  
23  
24 cerebrovascular disease, or mortality from HF and other CVD. Nonfatal myocardial  
25  
26 infarction was defined by the American Heart Association diagnostic criteria.<sup>14</sup>  
27  
28  
29  
30  
31  
32

### 33 **Statistical analysis**

34  
35  
36 Continuous variables are reported as mean  $\pm$  standard deviation (SD) or median  
37  
38 (interquartile range), and categorical variables are presented as counts and  
39  
40 percentages. Hs-cTnT was modelled as both a categorical and continuous variable.  
41  
42 For the analyses of hs-cTnT as a categorical variable, participants were divided into  
43  
44 four categories. Participants with undetectable hs-cTnT were placed in the first  
45  
46 category as the reference group. Those with hs-cTnT levels greater than or equal to  
47  
48 the previously reported 99th percentile value (14 ng/L)<sup>11</sup> were placed in the fourth  
49  
50 category, and those with levels between 3 and 14 ng/L were divided into two groups  
51  
52 for categories 2 and 3, respectively, based on the median value of hs-cTnT.  
53  
54  
55  
56  
57  
58  
59  
60

1  
2  
3  
4 Demographic and clinical variables were compared across hs-cTnT categories using  
5  
6 the one-way analysis of variance tests for continuous measures, Cuzik's  
7  
8 nonparametric trend test for nonnormally distributed variables, and chi-squared tests  
9  
10 for categorical variables.  
11  
12

13  
14 The cumulative incidence of MACE and all-cause mortality for each category of  
15  
16 hs-cTnT concentration were evaluated using the Kaplan-Meier method and compared  
17  
18 with the log-rank test. Multivariable Cox proportional hazards regression models  
19  
20 were used to analyse associations of hs-cTnT categories with outcomes, and category  
21  
22 1 was used as the reference. The models were incrementally adjusted for  
23  
24 demographics, traditional cardiovascular risk factors, renal function, and other  
25  
26 biomarkers (Hs-CRP and NT-proBNP). We also carried out an exploratory analysis,  
27  
28 in which cTnT was regarded as a continuous variable, and the relationship between  
29  
30 natural logarithm-transformed hs-cTnT values and end points was assessed. In this  
31  
32 analysis, values of cTnT that were below the lower limit of detection were assigned to  
33  
34 1.5 ng/L (i.e., one-half of the lower limit of detection).  
35  
36  
37  
38  
39  
40

41  
42 In view of the markedly skewed distribution of cTnT, changes in concentrations  
43  
44 over time were calculated as the difference between the natural logarithm of the  
45  
46 concentrations at follow-up and baseline. The association between changes in  
47  
48 hs-cTnT levels and outcomes were also evaluated in Cox proportional hazards models.  
49  
50 The change in hs-cTnT levels was entered as a continuous variable and was adjusted  
51  
52 for the baseline concentration of hs-cTnT and other relevant variables.  
53  
54  
55

56  
57 The discriminative capacity of a model with and without cTnT was estimated as  
58  
59  
60

1  
2  
3  
4 C-statistics. The area under the receiver operating characteristic curve summarised the  
5  
6 diagnostic discrimination. All data were analysed using the SPSS statistical package  
7  
8 software (version 17.0). A two-sided value of  $P < 0.05$  was considered statistically  
9  
10 significant.

## 11 12 13 **Results**

### 14 15 **Participant characteristics**

16  
17 For the present analyses, 1499 participants were included. The mean ( $\pm$ SD)  
18  
19 age of participants at enrolment was  $61.4 \pm 11.4$  years and 58.0% were women.  
20  
21 Detectable baseline cTnT levels were found in 820 individuals (54.7%; ranged from 3  
22  
23 to 176.4 ng/L) and were equal to or higher than 14 ng/L in 172 participants (11.5%).  
24  
25 Table 1 shows baseline characteristics by hs-cTnT categories. Compared with those  
26  
27 with lower cTnT levels, individuals with higher levels were older, more likely to be  
28  
29 male, more frequently hypertensive and diabetic, had lower eGFR and HDL-C levels,  
30  
31 and had higher uric acid and NT-proBNP levels. The use of antihypertensive drugs,  
32  
33 antidiabetic drugs, and aspirin varied across levels of hs-cTnT.  
34  
35  
36  
37  
38  
39  
40

### 41 42 **Outcomes by baseline hs-cTnT**

43  
44 Over a median follow-up period of 4.8 years (interquartile range: 4.5–5.2), 154  
45  
46 participants experienced new-onset MACE (including 99 coronary events and 61  
47  
48 strokes, and some participants had more than one event ). Fifty-two deaths occurred  
49  
50 from any cause. The cumulative incidences of MACE and all-cause mortality by  
51  
52 hs-cTnT categories are shown in Figure 1. As demonstrated by the Kaplan-Meier  
53  
54 survival analysis, there was a graded increase in the probability of adverse clinical  
55  
56  
57  
58  
59  
60

1  
2  
3  
4 events across categories. The unadjusted incidence rate for MACE ranged from 3.7%  
5  
6 in participants with undetectable hs-cTnT levels to 23.3% in participants in the  
7  
8 highest category ( $P<0.001$ , log-rank test). Similar trends were discovered for coronary  
9  
10 events, stroke, and all-cause mortality, and a particularly high risk was found for  
11  
12 participants in the highest category.  
13  
14  
15  
16  
17  
18  
19  
20  
21  
22  
23  
24  
25  
26  
27  
28  
29  
30  
31  
32  
33  
34  
35  
36  
37  
38  
39  
40  
41  
42  
43  
44  
45  
46  
47  
48  
49  
50  
51  
52  
53  
54  
55  
56  
57  
58  
59  
60



**Table 1. Characteristics of the study population by baseline high-sensitivity troponin T levels**

| Characteristics          | Hs-cTNT Group (ng/L)       |                              |                              |                         | P value<br>for Trend |
|--------------------------|----------------------------|------------------------------|------------------------------|-------------------------|----------------------|
|                          | Group 1<br><3.00 (n = 679) | Group 2<br>3.00-6.21 (n=324) | Group 3<br>6.22-<14 (n= 324) | Group4<br>≥14 (n = 172) |                      |
| Demographics             |                            |                              |                              |                         |                      |
| Age (years)              | 58.6±10.3                  | 63.1±10.7                    | 64.2±12.4                    | 61.8±11.5               | <0.001               |
| Male Sex; n (%)          | 202 (29.7)                 | 163 (50.3)                   | 170 (52.5)                   | 94 (54.7)               | <0.001               |
| BMI (kg/m <sup>2</sup> ) | 25.5±3.5                   | 25.7±3.2                     | 25.6±3.3                     | 25.8±3.5                | 0.498                |
| Medical history          |                            |                              |                              |                         |                      |
| Hypertension; n (%)      | 258 (38.0)                 | 159 (49.1)                   | 176 (54.3)                   | 97 (56.4)               | <0.001               |
| Diabetes mellitus; n (%) | 99 (14.6)                  | 72 (22.2)                    | 76 (23.5)                    | 45 (26.2)               | <0.001               |
| Current smoking; n (%)   | 85 (12.5)                  | 69 (21.3)                    | 62 (19.1)                    | 31(18.0)                | 0.003                |
| Systolic BP (mm Hg)      | 131.5±16.5                 | 132.7±17.3                   | 132.8±17.2                   | 133.2±17.1              | 0.041                |
| Diastolic BP (mm Hg)     | 77.1±9.7                   | 77.3±10.0                    | 76.4±10.5                    | 76.1±11.1               | 0.372                |
| Laboratory values        |                            |                              |                              |                         |                      |
| FBG (mmol/L)             | 5.3±1.4                    | 5.3±1.5                      | 5.5±1.7                      | 5.8±1.9                 | 0.076                |
| PBG (mmol/L)             | 7.5±3.7                    | 7.1±3.2                      | 8.1±4.3                      | 8.9±4.4                 | <0.001               |

|                                   |                   |                   |                   |                  |        |
|-----------------------------------|-------------------|-------------------|-------------------|------------------|--------|
| Total cholesterol (mmol/L)        | 5.1±0.9           | 5.1±0.9           | 5.1±0.9           | 5.0±0.9          | 0.464  |
| Triglycerides (mmol/L)            | 1.8±1.1           | 1.7±1.1           | 1.7±1.0           | 2.0±1.4          | 0.04   |
| LDL cholesterol (mmol/L)          | 3.0±0.7           | 2.9±0.7           | 3.0±0.7           | 3.0±0.7          | 0.136  |
| HDL cholesterol (mmol/L)          | 1.4±0.4           | 1.4±0.3           | 1.3±0.4           | 1.3±0.4          | 0.001  |
| Uric acid (µmol/L)                | 279.0±68.2        | 295.9±73.3        | 301.2±75.4        | 309.5±76.2       | <0.001 |
| eGFR (mL/min/1.73m <sup>2</sup> ) | 90.1±14.5         | 88.7±13.4         | 87.5±15.2         | 84.7±16.5        | 0.001  |
| NT-proBNP (pg/mL)                 | 37.2 (17.9, 75.3) | 38.9 (17.9, 74.4) | 46.6 (22.3, 90.1) | 49.3 (17.1, 112) | 0.003  |
| Hs-CRP (mg/L)                     | 2.4 (1.3, 3.4)    | 2.3 (1.4, 3.4)    | 2.2 (1.5, 3.5)    | 2.4 (1.6, 3.6)   | 0.383  |
| Medication use                    |                   |                   |                   |                  |        |
| Antihypertensives; n (%)          | 187 (27.5)        | 122 (37.7)        | 139 (42.9)        | 80 (46.5)        | <0.001 |
| Antidiabetics; n (%)              | 64 (9.4)          | 44 (13.6)         | 52 (16.0)         | 29 (16.9)        | 0.0028 |
| Lipid lowering drugs; n (%)       | 109 (16.1)        | 61 (18.8)         | 58 (17.9)         | 34 (19.8)        | 0.149  |
| Aspirin; n (%)                    | 137 (20.2)        | 79 (24.4)         | 89 (27.5)         | 55 (31.9)        | <0.001 |

Values are reported as n (%), mean ± SD, or median (interquartile range). BMI=body mass index; BP=blood pressure; eGFR =estimated glomerular filtration rate; FBG=fasting blood glucose;

HDL= high-density lipoprotein; Hs-CRP = high-sensitivity C-reactive protein; LDL = low- density lipoprotein; PBG= postprandial blood glucose; NT-proBNP = N-terminal pro-type B

natriuretic peptide.

## Associations of baseline hs-cTnT levels with MACE and all-cause mortality

In a series of Cox proportional hazards models adjusting for age and gender (model 1), and further adjusting for traditional cardiovascular risk factors (model 2), higher hs-cTnT categories demonstrated a graded association with MACE. Only a modest attenuation of the hazards was found with further adjustment for renal function (model 3). Although a significant attenuation was discovered with additional adjustments for hs-CRP and NT-proBNP levels (model 4), hs-cTnT levels in the third category (hazard ratio [HR]: 2.31, 95% CI: 1.39–3.84) and fourth category (HR: 3.27, 95% CI: 1.88–5.70) remained independently associated with MACE in the fully adjusted models. Participants in hs-cTnT categories 3 and 4 also had a significantly higher risk of coronary events compared with participants with undetectable levels (HRs of 2.76 [95% CI: 1.44–5.31] and 4.50 [95% CI: 2.26–9.02], respectively, in model 4; Table 2). However, associations of hs-cTnT levels with stroke events were markedly attenuated and no longer significant after adjusting for NT-proBNP (model 4; Table 2). Membership in the highest hs-cTnT category was independently associated with all-cause mortality (HR: 2.07, 95% CI: 1.05–3.01) in both univariate and multivariate analyses.

In an exploratory research of hs-cTnT as a continuous variable after natural logarithmic transformation, we found a continuous association with MACE incidence (per one- logarithmic unit increment; HR: 1.67; 95% CI, 1.04–2.68;  $P < 0.001$ ), coronary events (HR: 1.68; 95% CI, 1.35–2.08;  $P < 0.001$ ) or all-cause mortality (HR:

1.50; 95% CI, 1.26–1.79; P=0.003) in fully multivariate models encompassing the variables described in Table 2. No association between stroke risk and cTnT as a continuous variable was found in the final adjusted models (HR: 1.06; 95% CI, 0.87–1.32; P=0.17).

**Table 2. Cox proportional hazards models analysis for associations between baseline hs-cTnT levels and outcomes**

|                     | Hazard Ratio (95% Confidence Interval) |                          |                          |                     |
|---------------------|----------------------------------------|--------------------------|--------------------------|---------------------|
|                     | Group 1<br><3.00 ng/L                  | Group 2<br>3.0–6.21 ng/L | Group 3<br>6.22–<14 ng/L | Group 4<br>≥14 ng/L |
| No.                 | 679                                    | 324                      | 324                      | 172                 |
| MACE                | n=25 (3.7%)                            | n=30 (9.3%)              | n=59 (18.2%)             | n=40 (23.3%)        |
| Model 1             | 1[Reference]                           | 1.65 (0.97–2.81)         | 2.65 (1.64–4.27)         | 4.20 (2.51–7.02)    |
| Model 2             | 1[Reference]                           | 1.52 (0.89–2.59)         | 2.41 (1.48–3.91)         | 3.82 (2.27–6.43)    |
| Model 3             | 1[Reference]                           | 1.52 (0.89–2.61)         | 2.38 (1.47–3.88)         | 3.79 (2.26–6.39)    |
| Model 4             | 1[Reference]                           | 1.68 (0.97–2.92)         | 2.31 (1.39–3.84)         | 3.27 (1.88–5.70)    |
| Coronary event      | n=14 (2.1%)                            | n=17 (5.3%)              | n=41 (12.7%)             | n=27 (15.7%)        |
| Model 1             | 1[Reference]                           | 1.69 (0.83–3.44)         | 3.39 (1.82–6.29)         | 5.23 (2.7–10.14)    |
| Model 2             | 1[Reference]                           | 1.61 (0.78–3.29)         | 3.25 (1.74–6.07)         | 5.5 (2.84–10.64)    |
| Model 3             | 1[Reference]                           | 1.57 (0.76–3.22)         | 3.09 (1.65–5.79)         | 5.14 (2.65–9.98)    |
| Model 4             | 1[Reference]                           | 1.42 (0.71–2.89)         | 2.76 (1.44–5.31)         | 4.50 (2.26–9.02)    |
| Stroke event        | n=11 (1.6%)                            | n=13 (4.0%)              | n=20 (6.2%)              | n=17 (9.9%)         |
| Model 1             | 1[Reference]                           | 1.59 (0.71–3.57)         | 1.94 (0.91–4.14)         | 3.84 (1.75–8.43)    |
| Model 2             | 1[Reference]                           | 1.47 (0.65–3.29)         | 1.77 (0.83–3.79)         | 3.19 (1.42–7.16)    |
| Model 3             | 1[Reference]                           | 1.47 (0.65–3.31)         | 1.70 (0.79–3.66)         | 3.16 (1.41–7.10)    |
| Model 4             | 1[Reference]                           | 1.03 (0.50–2.09)         | 1.13 (0.57–2.14)         | 1.27 (0.69–2.62)    |
| All-cause mortality | n=8 (1.2%)                             | n=7 (2.2%)               | n=16 (4.9%)              | n=21 (12.2%)        |
| Model 1             | 1[Reference]                           | 1.13 (0.41–3.14)         | 1.99 (0.83–4.76)         | 6.14 (2.61–14.46)   |

|         |              |                  |                  |                   |
|---------|--------------|------------------|------------------|-------------------|
| Model 2 | 1[Reference] | 1.13 (0.41–3.14) | 1.78 (0.73–4.35) | 4.87 (1.99–11.88) |
| Model 3 | 1[Reference] | 1.14 (0.41–3.16) | 1.79 (0.73–4.38) | 4.87 (1.99–11.88) |
| Model 4 | 1[Reference] | 1.01 (0.40–1.15) | 1.09 (0.43–2.76) | 2.07 (1.05–3.01)  |

Abbreviations: MACE, major adverse cardiovascular event.

Models are defined as follows: model 1=adjusted for age and gender; model 2=adjusted for model 1 + presence of hypertension or diabetes mellitus, current smoking status, systolic blood pressure, postprandial blood glucose, total cholesterol, high-density lipoprotein cholesterol, antihypertensive medication use, and antidiabetic medication use; model 3= adjusted for model 2 + estimated glomerular filtration rate; model 4= adjusted for model 3 + high-sensitivity C-reactive protein and N-terminal pro-B-type natriuretic peptide (both after logarithmic transformation).

### Changes in hs-cTnT concentration during follow-ups and subsequent events

Table 3 presents the results of Cox regression analysis for subsequent events in relation to changes in hs-cTnT concentration as a continuous variable. Changes in hs-cTnT concentration were strongly associated with subsequent events except for stroke, even in multivariable analyses that additionally adjusted for baseline hs-cTnT levels. In the fully adjusted models, the HRs for MACE, and coronary events for every unit increasing in hs-cTnT concentration, were 1.35 (95% CI: 1.08–1.68, P=0.008) and 1.44 (95% CI: 1.17–1.77, P=0.001), respectively. However, an increase in hs-cTnT concentration was not significantly associated with stroke events (HR: 1.02, 95% CI: 0.64–2.19, P=0.242).

**Table 3. Association of changes in hs-cTnT concentrations with subsequent events**

|  | Multivariable-adjusted HR | 95% CI | P Value |
|--|---------------------------|--------|---------|
|--|---------------------------|--------|---------|

|                |      |           |       |
|----------------|------|-----------|-------|
| MACE           | 1.35 | 1.08–1.68 | 0.008 |
| Coronary event | 1.44 | 1.17–1.77 | 0.001 |
| Stroke event   | 1.02 | 0.64–2.19 | 0.242 |

Abbreviations: HR, hazard ratio; CI, confidence interval; MACE, major adverse cardiovascular event. Data are presented as hazard ratios and 95% confidence intervals for a 1-unit increase in the change in hs-cTnT on a log scale. Multivariable model was adjusted for the covariates listed for Model 4 in Table 2, plus the baseline hs-cTnT level.

### Hs-cTnT and risk prediction

Hs-cTnT provided incremental prognostic information regarding the three endpoints when added to a model based on established risk indicators (Table 4). The addition of hs-cTnT increased the c-statistic from 0.671 to 0.698 (P=0.003) for the prediction of all-cause mortality. The prediction of MACE also improved from 0.702 to 0.734 (P<0.001).

**Table 4. Discrimination of adverse outcomes with the addition of hs-cTnT to the clinical risk factor model**

| Endpoint            | c-statistic (95%CI) |                          | P Value |
|---------------------|---------------------|--------------------------|---------|
|                     | Clinical Model      | Clinical Model + hs-cTnT |         |
| All-cause mortality | 0.671 (0.646–0.704) | 0.698 (0.680–0.725)      | 0.003   |
| MACE                | 0.702 (0.680–0.726) | 0.734 (0.714–0.758)      | <0.001  |
| Coronary event      | 0.713 (0.701–0.735) | 0.749 (0.729–0.768)      | <0.001  |
| Stroke event        | 0.683 (0.665–0.709) | 0.697 (0.674–0.729)      | 0.09    |

Abbreviations: CI, confidence interval; MACE, major adverse cardiovascular event.

1  
2  
3  
4 The clinical risk factor model included age, gender, body mass index, current smoking status, diabetes mellitus,  
5  
6 systolic blood pressure, diastolic blood pressure, total cholesterol, high-density lipoprotein cholesterol, and  
7  
8 estimated glomerular filtration rate.  
9

## 10 11 **Discussion**

12  
13  
14 The main purpose of the current study was to evaluate the usefulness of  
15  
16 measuring hs-cTnT for predicting major cardiovascular events and all-cause mortality  
17  
18 in a community-dwelling study of general population. There were several valuable  
19  
20 findings. First, the up-to-date generation of cTnT assay allowed for minimal  
21  
22 subclinical myocardial injury to be reliably detected in some individuals of a general  
23  
24 population covering a wide age range. There was no need to restrict the study to  
25  
26 morbid or high-risk individuals. Second, baseline and kinetic changes in hs-cTnT  
27  
28 concentration were powerful and independent predictors of long-term MACE and  
29  
30 all-cause mortality. Finally, these risk predictions were persistent, even after adjusting  
31  
32 for traditional cardiovascular risk factors and biomarkers of inflammation and cardiac  
33  
34 wall strain.  
35  
36  
37  
38  
39

40  
41 Cardiac troponins are generally the preferred biomarkers of myocardial  
42  
43 necrosis and are typically used in the diagnosis of acute coronary syndromes. But the  
44  
45 recently available hs-cTnT assay has allowed for the detection of much lower  
46  
47 concentrations of circulating cTnT. More recent observations using this new assay  
48  
49 have shown that very low levels of circulating cTnT can be detectable, these levels of  
50  
51 circulating cTnT can provide information about coronary plaque characteristics and  
52  
53 mortality in patients with stable CHD,<sup>15-16</sup> and very low levels of circulating cTnT  
54  
55  
56  
57  
58  
59  
60

1  
2  
3  
4 can even be detected in the general population.<sup>17-18</sup> The exact mechanisms of troponin  
5  
6 release in apparently healthy individuals are not well clarified. One possibility is the  
7  
8 existence of asymptomatic cardiac ischaemia with minimal myocardial injury, which  
9  
10 results in the asymptomatic release of troponins.<sup>19</sup> Other mechanisms include  
11  
12 cardiomyocyte apoptosis,<sup>20</sup> physiological cell turnover,<sup>21</sup> or subclinical cardiac  
13  
14 structural or functional abnormalities.<sup>22-23</sup>  
15  
16  
17  
18

19       The prognostic implications of hs-cTnT assays among apparently healthy  
20  
21 individuals have recently been explored in three large cohort studies.<sup>18, 24-25</sup> However,  
22  
23 these studies focused on middle-aged and elderly subjects from western countries.  
24  
25 Our study extends the findings to the Asian population and demonstrates the  
26  
27 significance of the hs-cTnT assay in risk assessment. To the best of our knowledge,  
28  
29 this is the first study to evaluate the potential utility of the hs-cTnT assay in a Chinese  
30  
31 population. One important finding is the observation that the presence of an elevated  
32  
33 hs-cTnT level (in the highest category) was associated with adverse outcomes  
34  
35 regarding all-cause mortality and MACE. However, there were no associations  
36  
37 between minimally detectable hs-cTnT levels, especially those below 6.2 ng/L, and  
38  
39 death or MACE. It has been proposed that such levels may be physiological,  
40  
41 reflecting normal myocardial cell turnover and apoptosis within the senescent heart  
42  
43 tissue.<sup>26</sup> The levels may also be a result of the cortisol response to mental stress in  
44  
45 healthy adults.<sup>27</sup> Further research is required to determine which hs-cTnT threshold  
46  
47 value may best be used in risk prediction.  
48  
49  
50  
51  
52  
53  
54

55       Although other biomarkers, such as hs-CRP and NT-proBNP, have been used to  
56  
57  
58  
59  
60



1  
2  
3 identify apparently healthy individuals who are at increased CVD risk,<sup>28-29</sup> our  
4  
5 investigation indicates that hs-cTnT was also independent of these biomarkers. In this  
6  
7 cohort, although associations with death and cardiovascular events were significantly  
8  
9 attenuated after additional adjustments for levels of NT-proBNP, hs-cTnT remained  
10  
11 independently predictive of end points in the final model, suggesting that the two  
12  
13 biomarkers convey slightly different information for cardiac structural and functional  
14  
15 abnormalities. The HRs remained statistically significant after adjusting for traditional  
16  
17 cardiovascular risk factors and renal function, and were consistent with results from  
18  
19 other studies.<sup>8,30</sup> These data indicate that very low levels of cTnT may be used to  
20  
21 identify subclinical myocardial injury and estimate the risk of cardiovascular events,  
22  
23 which are currently not fully estimated by established methods. Also, associations of  
24  
25 hs-cTnT concentration with all-cause mortality and MACE were consistent in the  
26  
27 stratification analysis defined by sex.  
28  
29  
30  
31  
32  
33  
34  
35

36 Our data also suggest that even minimal changes in low levels of cTnT have  
37  
38 prognostic characteristics and can help to identify individuals at long-term risk for  
39  
40 adverse events. There seemed to be a dose-dependent relationship between increased  
41  
42 hs-cTnT and increased risk. Similarly, DeFilippi et al.<sup>24</sup> have reported that changes in  
43  
44 cTnT concentrations, which were determined with a highly sensitive assay, are  
45  
46 significantly associated with incident HF events and cardiovascular death in  
47  
48 community-based older adults. Furthermore, in a prospective cohort of ambulatory  
49  
50 older adults, a strong increase in the risk of sudden cardiac death<sup>31</sup> and incident atrial  
51  
52 fibrillation<sup>32</sup> was associated with changes in hs-cTnT concentrations over time.  
53  
54  
55  
56  
57  
58  
59  
60

1  
2  
3  
4 Although these changes may reflect normal physiological variation, their relation to  
5  
6 future adverse events, regardless of baseline hs-cTnT levels, indicates that they may  
7  
8 really represent dynamic changes in risk stratification.  
9

10  
11 In contrast to the strong associations with mortality and MACE, hs-cTnT  
12  
13 concentration was not associated with stroke occurrence after adjusting for multiple  
14  
15 variables. There are several potential explanations for this finding. First, cardiac  
16  
17 troponin specifically reflects myocardial necrosis or subclinical myocardial injury.  
18  
19 Some studies have indicated that in comparison to coronary atherosclerosis, structural  
20  
21 heart abnormalities are more powerful determinations of myocardial injury in the  
22  
23 general population.<sup>33-34</sup> Second, the Atherosclerosis Risk in Communities Study<sup>35</sup>  
24  
25 showed that elevated plasma hs-cTnT levels are associated with an increased risk of  
26  
27 non-lacunar ischaemic strokes, and especially cardioembolic stroke, but not with  
28  
29 hemorrhagic stroke in the general population. Epidemiological data have  
30  
31 demonstrated that there are differences in incidence rates of stroke subtypes between  
32  
33 Chinese and western populations. Intracerebral haemorrhage (ICH) accounts for only  
34  
35 10–15% of strokes in most western populations,<sup>36</sup> whereas up to 55% of strokes in  
36  
37 the Chinese population are due to ICH.<sup>37</sup> Although an analysis for ischaemic stroke as  
38  
39 an endpoint was conducted (data not shown), less than half of all strokes were due to  
40  
41 ischaemia, and it was impossible to achieve statistical significance.  
42  
43  
44  
45  
46  
47  
48  
49  
50

51 Our study has several limitations. First, cardiovascular treatment has changed  
52  
53 over time, and it is possible that a higher frequency of the use of medications, such as  
54  
55 statins and antiplatelet drugs, could have lowered the predictive value of hs-cTnT.  
56  
57  
58  
59  
60

1  
2  
3  
4 Second, no echocardiographic and coronary artery imaging data were obtained. Thus,  
5  
6 no causal explanations for the associations among hs-cTnT levels, cardiac  
7  
8 abnormalities, and outcomes could be provided. Third, the incidence rate of adverse  
9  
10 events was relatively low in this cohort, and hs-cTnT levels were detected in a  
11  
12 considerable proportion. This could limit its potential for predicting long-term events.  
13  
14 Finally, the study population was restricted to Chinese residents of Han origin.  
15  
16 Extrapolation of the results to other demographic groups should be done with caution.  
17  
18 The predictive value of hs-cTnT needs to be further validated in other observational  
19  
20 studies.  
21  
22  
23  
24

## 25 26 **Conclusion**

27  
28 In this prospective cohort of a community-dwelling population, we found that  
29  
30 both baseline cTnT and changes in cTnT, as detected by a highly sensitive assay, were  
31  
32 independently associated with adverse outcomes. The results suggest that cTnT may  
33  
34 be an important biomarker in the prediction of mortality and cardiovascular events in  
35  
36 apparently healthy individuals. Further investigations are warranted to elucidate the  
37  
38 mechanisms for cTnT release in these individuals and to test whether active  
39  
40 interventions can reduce the associated risk contributed by elevated troponin levels.  
41  
42  
43  
44  
45  
46  
47  
48

49 **Contributorship statement:** The manuscript has been read and approved by all  
50  
51 of the authors. All authors contributed to the intellectual development of this paper.  
52  
53 Conceived and designed the experiments: Ping Ye. Performed the experiments:  
54  
55 Wenkai Xiao, Yuan Liu. Analyzed the data: Wenkai Xiao and Yongyi Bai. Wrote the  
56  
57  
58  
59  
60

1  
2  
3  
4 manuscript: Wenkai Xiao. Supervised data collection: Rui Cao, Fan Wang, Hongmei  
5  
6 Wu.  
7

8  
9 **Competing Interests:** The authors have declared that no competing interests  
10  
11 exist.  
12

13  
14 **Funding:** This study was supported by grants from the Key National Basic  
15  
16 Research Program of China (2012CB517503, 2013CB530804) and the Key Science  
17  
18 and Technology Foundation of China (2012ZX09303004-002) to P Ye.  
19

20  
21 **Data sharing statement:** The additional unpublished data from the study are  
22  
23 available. We can share the original data for this research article.  
24

25  
26 **Acknowledgements** We thank our colleagues at the Department of Laboratory  
27  
28 Medicine of the PLA General Hospital for their help with biochemical measurements.  
29  
30 We are also grateful to all study participants for their rigorous work.  
31  
32  
33  
34  
35

## 36 37 38 39 40 41 42 43 44 45 46 47 48 49 50 51 52 53 54 55 56 57 58 59 60

### References

1. Khot UN, Khot MB, Bajzer CT, et al. Prevalence of conventional risk factors in patients with coronary heart disease. *JAMA* 2003;290:898-904.
2. Melander O, Newton-Cheh C, Almgren P, et al. Novel and conventional biomarkers for prediction of incident cardiovascular events in the community. *JAMA* 2009;302:49-57.
3. Blankenberg S, Zeller T, Saarela O, et al. Contribution of 30 biomarkers to 10-year cardiovascular risk estimation in 2 population cohorts: the MONICA, Risk, Genetics, Archiving, and Monograph (MORGAM) biomarker project. *Circulation* 2010;121:

1  
2  
3  
4 2388-97.

5  
6 4. Thygesen K, Mair J, Katus H, et al. Recommendations for the use of cardiac  
7  
8 troponin measurement in acute cardiac care. *Eur Heart J* 2010;31: 2197–204.

9  
10 5. Bandstein N, Ljung R, Johansson M, et al. Undetectable High-Sensitivity Cardiac  
11  
12 Troponin T Level in the Emergency Department and Risk of Myocardial Infarction. *J*  
13  
14 *Am Coll Cardiol* 2014;63:2569-78.

15  
16 6. Zethelius B, Berglund L, Sundstrom J, et al. Use of multiple biomarkers to improve  
17  
18 the prediction of death from cardiovascular causes. *N Engl J Med* 2008;358: 2107–16.

19  
20 7. Daniels LB, Laughlin GA, Clopton P, et al. Minimally elevated cardiac troponin T  
21  
22 and elevated N-terminal pro-B-type natriuretic peptide predict mortality in older  
23  
24 adults: results from the Rancho Bernardo Study. *J Am Coll Cardiol* 2008;52:450–9.

25  
26 8. Eggers KM, Al-Shakarchi J, Berglund L, et al. High-sensitive cardiac troponin T  
27  
28 and its relations to cardiovascular risk factors, morbidity, and mortality in elderly men.  
29  
30 *Am Heart J* 2013;166:541-8.

31  
32 9. Masson S, Anand I, Favero C, et al. Serial Measurement of Cardiac Troponin T  
33  
34 Using a Highly Sensitive Assay in Patients With Chronic Heart Failure. *Circulation*  
35  
36 2012;125:280-8.

37  
38 10. Beatty AL, Ku IA, Christenson RH, et al. High-sensitivity cardiac troponin T and  
39  
40 secondary events in outpatients with coronary heart disease from the Heart and Soul  
41  
42 Study. *JAMA Intern Med* 2013;173:763–9.

43  
44 11. Giannitsis E, Kurz K, Hallermayer K, et al. Analytical validation of a high-  
45  
46 sensitivity cardiac troponin T assay. *Clin Chem* 2010;56:254-261.  
47  
48  
49  
50  
51  
52  
53  
54  
55  
56  
57  
58  
59  
60

- 1  
2  
3  
4 12. Ma YC, Zuo L, Chen JH, et al. Modified glomerular filtration rate estimating  
5  
6 equation for chinese patients with chronic kidney disease. *J Am Soc Nephrol* 2006; 17:  
7  
8 2937-44.  
9  
10  
11 13. Sacco RL, Kasner SE, Broderick JP, et al. An updated definition of stroke for  
12  
13 the 21st century: statement for healthcare professionals from the American  
14  
15 Heart Association/American Stroke Association. *Stroke* 2013;44:2064-89.  
16  
17  
18 14. Luepker RV, Apple FS, Christenson RH, et al. Case definitions for acute coronary  
19  
20 heart disease in epidemiology and clinical research studies. *Circulation* 2003;108:  
21  
22 2543-9.  
23  
24  
25  
26 15. Oemrawsingh RM, Cheng JM, García-García HM, et al. High-sensitivity  
27  
28 Troponin T in relation to coronary plaque characteristics in patients with stable  
29  
30 coronary artery disease; results of the ATHEROREMO-IVUS study. *Atherosclerosis*  
31  
32 2016;247:135-41.  
33  
34  
35  
36 16. Giannitsis E, Spanuth E, Horsch A, et al. High-sensitivity cardiac troponin T and  
37  
38 N-terminal pro-B-type natriuretic peptide predict mortality in stable coronary artery  
39  
40 disease: results from the Ludwigshafen Risk and Cardiovascular Health (LURIC)  
41  
42 study. *Clin Chem Lab Med* 2013;51:2019-28.  
43  
44  
45  
46 17. Rubin J, Matsushita K, Lazo M, et al. Determinants of minimal elevation  
47  
48 in high-sensitivity cardiac troponin T in the general population. *Clin Biochem* 2016;  
49  
50 49:657-62.  
51  
52  
53  
54 18. Saunders JT, Nambi V, de Lemos JA, et al. Cardiac troponin T measured by a  
55  
56 highly sensitive assay predicts coronary heart disease, heart failure, and mortality in  
57  
58  
59  
60

- 1  
2  
3  
4 the Atherosclerosis Risk in Communities Study. *Circulation* 2011;123:1367-76.
- 5  
6 19. Turer AT, Addo TA, Martin JL, et al. Myocardial ischemia induced by rapid atrial  
7  
8 pacing causes troponin T release detectable by a highly sensitive assay: insights from  
9  
10 a coronary sinus sampling study. *J Am Coll Cardiol* 2011;57:2398-405.
- 11  
12  
13 20. White HD. Pathobiology of troponin elevations: do elevations occur with  
14  
15 myocardial ischemia as well as necrosis? *J Am Coll Cardiol* 2011;57:2406-8.
- 16  
17  
18 21. Røsjø H, Andreassen J, Edvardsen T, et al. Prognostic usefulness of circulating  
19  
20 high-sensitivity troponin T in aortic stenosis and relation to echocardiographic  
21  
22 indexes of cardiac function and anatomy. *Am J Cardiol* 2011;108:88-91.
- 23  
24  
25 22. Kawasaki T, Sakai C, Harimoto K, et al. Usefulness of High-Sensitivity Cardiac  
26  
27 Troponin T and Brain Natriuretic Peptide as Biomarkers of Myocardial Fibrosis in  
28  
29 Patients With Hypertrophic Cardiomyopathy. *Am J Cardiol* 2013;112:867-72.
- 30  
31  
32 23. Ravassa S, Kuznetsova T, Varo N, et al. Biomarkers of cardiomyocyte injury and  
33  
34 stress identify left atrial and left ventricular remodelling and dysfunction: A  
35  
36 population-based study. *Int J Cardiol* 2015;185:177-85.
- 37  
38  
39 24. deFilippi CR, de Lemos JA, Christenson RH, et al. Association of serial measures  
40  
41 of cardiac troponin T using a sensitive assay with incident heart failure and  
42  
43 cardiovascular mortality in older adults. *JAMA* 2010;304:2494-502.
- 44  
45  
46 25. de Lemos JA, Drazner MH, Omland T, et al. Association of troponin T detected  
47  
48 with a highly sensitive assay and cardiac structure and mortality risk in the general  
49  
50 population. *JAMA* 2010;304:2503-12.
- 51  
52  
53 26. Sze J, Mooney J, Barzi F, et al. Cardiac Troponin and its Relationship to  
54  
55  
56  
57  
58  
59  
60

1  
2  
3 Cardiovascular Outcomes in Community Populations – A Systematic Review and  
4  
5  
6 Meta-analysis. *Heart Lung Circ* 2016;25:217-28.  
7

8  
9 27. Lazzarino AI, Hamer M, Gaze D, et al. The association between cortisol response  
10  
11 to mental stress and high-sensitivity cardiac troponin T plasma concentration in  
12  
13 healthy adults. *J Am Coll Cardiol* 2013; 62:1694-701.  
14

15  
16 28. Schnell-Inderst P, Schwarzer R, Göhler A, et al. Prognostic value, clinical  
17  
18 effectiveness, and cost-effectiveness of high - sensitivity C-reactive protein as a  
19  
20 marker for major cardiac events in asymptomatic individuals: a health technology  
21  
22 assessment report. *Int J Technol Assess Health Care* 2010; 26:30-9.  
23

24  
25 29. Daniels LB, Clopton P, deFilippi CR, et al. Serial measurement of N- terminal  
26  
27 pro-B-type natriuretic peptide and cardiac troponin T for cardiovascular disease risk as  
28  
29 assessment in the Multi-Ethnic Study of Atherosclerosis (MESA). *Am Heart J* 2015;  
30  
31 170:1170-83.  
32  
33

34  
35 30. Scheven L, de Jong PE, Hillege HL, et al. High-sensitive troponin T and N-  
36  
37 terminal pro -B type natriuretic peptide are associated with cardiovascular events  
38  
39 despite the cross- sectional association with albuminuria and glomerular filtration rate.  
40  
41  
42  
43  
44 *Eur Heart J* 2012; 33:2272-81.  
45

46  
47 31. Hussein AA, Gottdiener JS, Bartz TM, et al. Cardiomyocyte injury assessed by  
48  
49 a highly sensitive troponin assay and sudden cardiac death in the community: the  
50  
51 Cardiovascular Health Study. *J Am Coll Cardiol* 2013;62:2112-20.  
52

53  
54 32. Hussein AA, Bartz TM, Gottdiener JS, et al. Serial measures of cardiac troponin  
55  
56 T levels by a highly sensitive assay and incident atrial fibrillation in a prospective  
57  
58  
59  
60



1  
2  
3 cohort of ambulatory older adults. *Heart Rhythm* 2015;12:879-85.

4  
5  
6 33. Masson S, Latini R, Mureddu GF, et al. High-sensitivity cardiac troponin T for  
7  
8 detection of subtle abnormalities of cardiac phenotype in a general population of  
9  
10 elderly individuals. *J Intern Med* 2013;273:306-17.

11  
12  
13 34. de Lemos JA, deFilippi CR. Prevalence and significance of detectable troponins as  
14  
15 measured by highly sensitive assays in the general population. *Coronary Artery*  
16  
17 *Disease* 2013;24:705-9.

18  
19  
20  
21 35. Folsom AR, Nambi V, Bell EJ, et al. Troponin T, N-Terminal Pro-B-Type  
22  
23 Natriuretic Peptide, and Incidence of Stroke. The Atherosclerosis Risk in  
24  
25 Communities Study. *Stroke* 2013; 44:961-7.

26  
27  
28  
29 36. Lloyd-Jones D, Adams R, Carnethon M, et al. Heart disease and stroke  
30  
31 statistics-2009 update: a report from the American Heart Association Statistics  
32  
33 Committee and Stroke Statistics Subcommittee. *Circulation* 2009;119:480-6.

34  
35  
36 37. Yang QD, Niu Q, Zhou YH, et al. Incidence of cerebral hemorrhage in the  
37  
38 Changsha community. A prospective study from 1986 to 2000. *Cerebrovasc Dis.*  
39  
40 2004;17:303-13.  
41  
42  
43  
44  
45  
46  
47  
48  
49  
50  
51  
52  
53  
54  
55  
56  
57  
58  
59  
60

1  
2  
3  
4  
5  
6  
7  
8  
9  
10  
11  
12  
13  
14  
15  
16  
17  
18  
19  
20  
21  
22  
23  
24  
25  
26  
27  
28  
29  
30  
31  
32  
33  
34  
35  
36  
37  
38  
39  
40  
41  
42  
43  
44  
45  
46  
47  
48  
49  
50  
51  
52  
53  
54  
55  
56  
57  
58  
59  
60

### A Major adverse cardiovascular events



| No. at risk |     |     |     |     |
|-------------|-----|-----|-----|-----|
| Group 1     | 679 | 676 | 649 | 344 |
| Group 2     | 324 | 318 | 307 | 103 |
| Group 3     | 324 | 311 | 285 | 105 |
| Group 4     | 172 | 161 | 140 | 45  |

95x106mm (600 x 600 DPI)

**B Coronary event**



No. at risk

|         |     |     |     |     |
|---------|-----|-----|-----|-----|
| Group 1 | 679 | 676 | 649 | 344 |
| Group 2 | 324 | 318 | 307 | 103 |
| Group 3 | 324 | 311 | 285 | 105 |
| Group 4 | 172 | 161 | 140 | 45  |

84x98mm (600 x 600 DPI)

### C Stroke



| No. at risk | 0   | 20  | 40  | 60  |
|-------------|-----|-----|-----|-----|
| Group 1     | 679 | 676 | 649 | 344 |
| Group 2     | 324 | 318 | 307 | 103 |
| Group 3     | 324 | 311 | 285 | 105 |
| Group 4     | 172 | 161 | 140 | 45  |

99x114mm (600 x 600 DPI)

1  
2  
3  
4  
5  
6  
7  
8  
9  
10  
11  
12  
13  
14  
15  
16  
17  
18  
19  
20  
21  
22  
23  
24  
25  
26  
27  
28  
29  
30  
31  
32  
33  
34  
35  
36  
37  
38  
39  
40  
41  
42  
43  
44  
45  
46  
47  
48  
49  
50  
51  
52  
53  
54  
55  
56  
57  
58  
59  
60

**D All-cause mortality**



| No. at risk |     |     |     |     |
|-------------|-----|-----|-----|-----|
| Group 1     | 679 | 674 | 649 | 344 |
| Group 2     | 324 | 318 | 307 | 103 |
| Group 3     | 324 | 311 | 285 | 105 |
| Group 4     | 172 | 161 | 140 | 45  |

**Figure1. Risk for Cardiovascular Events and All-Cause Mortality by Baseline hs-cTnT Level**  
Kaplan-Meier survival curves indicating cumulative incidence of MACE (A), Coronary event (B), Stroke (C) and All-cause mortality (D) across baseline hs-cTnT categories. Groups are indicated by colors, P<0.001 for all between-group comparisons by the log-rank test.

113x89mm (600 x 600 DPI)

**Supplementary Table1. Characteristics of Study Population between the follow up and lost groups**

| Characteristics                   | Baseline population         |                                    | P value |
|-----------------------------------|-----------------------------|------------------------------------|---------|
|                                   | Follow up group<br>(n=1499) | lost to follow up group<br>(n=181) |         |
| <b>Demographic</b>                |                             |                                    |         |
| Age ( years)                      | 61.4±11.4                   | 57.6±10.5                          | <0.01   |
| Male Sex n (%)                    | 629 (42.0)                  | 83(45.9)                           | 0.316   |
| BMI (kg/m <sup>2</sup> )          | 25.6±3.3                    | 25.8±3.4                           | 0.273   |
| <b>Medical history</b>            |                             |                                    |         |
| Hypertension n (%)                | 690(46.0)                   | 72(39.8)                           | 0.111   |
| Diabetes mellitus n (%)           | 292(19.5)                   | 30(16.6)                           | 0.348   |
| Current smoking n (%)             | 247(16.5)                   | 35(19.3)                           | 0.331   |
| Systolic BP (mm Hg)               | 132.7±17.0                  | 130.6±16.7                         | 0.136   |
| Diastolic BP (mm Hg)              | 76.6±10.3                   | 77.8±10.7                          | 0.077   |
| <b>Laboratory values</b>          |                             |                                    |         |
| FBG (mmol/L)                      | 5.4±1.6                     | 5.3±1.5                            | 0.474   |
| PBG (mmol/L)                      | 8.0±4.2                     | 7.5±3.7                            | <0.05   |
| Total cholesterol (mmol/L)        | 5.1±0.9                     | 5.0±0.9                            | 0.321   |
| Triglycerides (mmol/L)            | 1.8±1.2                     | 1.9±1.1                            | 0.054   |
| LDL cholesterol (mmol/L)          | 3.0±0.7                     | 2.9±0.6                            | 0.21    |
| HDL cholesterol (mmol/L)          | 1.4±0.3                     | 1.4±0.3                            | 0.386   |
| Uric acid (μmol/L)                | 291.4±73.3                  | 276.9±70.8                         | <0.01   |
| eGFR (mL/min/1.73m <sup>2</sup> ) | 88.9±15.5                   | 92.1±16.0                          | 0.009   |
| NT-proBNP (pg/mL)                 | 41.7(19.8,81.9)             | 37.4(17.3,73.9)                    | <0.01   |
| Hs-CRP (mg/L)                     | 2.3 (1.4, 3.5)              | 2.2 (1.3, 3.4)                     | 0.189   |
| <b>Medication use</b>             |                             |                                    |         |
| Antihypertensives n (%)           | 528 (35.2)                  | 55 (30.4)                          | 0.197   |
| Antidiabetic n (%)                | 189 (12.6)                  | 19 (10.5)                          | 0.415   |

1  
2  
3  
4  
5  
6  
7  
8  
9  
10  
11  
12  
13  
14  
15  
16  
17  
18  
19  
20  
21  
22  
23  
24  
25  
26  
27  
28  
29  
30  
31  
32  
33  
34  
35  
36  
37  
38  
39  
40  
41  
42  
43  
44  
45  
46  
47  
48  
49  
50  
51  
52  
53  
54  
55  
56  
57  
58  
59  
60

|                |       |            |           |       |
|----------------|-------|------------|-----------|-------|
| Lipid lowering | n (%) | 262 (17.5) | 29(16.0)  | 0.625 |
| Aspirin        | n (%) | 360 (24.0) | 37 (20.4) | 0.285 |

---

For peer review only

STROBE Statement—checklist of items that should be included in reports of observational studies

|                              | Item No. | Recommendation                                                                                                                                                                             | Page No. | Relevant text from manuscript |
|------------------------------|----------|--------------------------------------------------------------------------------------------------------------------------------------------------------------------------------------------|----------|-------------------------------|
| <b>Title and abstract</b>    | 1        | (a) Indicate the study’s design with a commonly used term in the title or the abstract                                                                                                     | 1        |                               |
|                              |          | (b) Provide in the abstract an informative and balanced summary of what was done and what was found                                                                                        | 2        |                               |
| <b>Introduction</b>          |          |                                                                                                                                                                                            |          |                               |
| Background/rationale         | 2        | Explain the scientific background and rationale for the investigation being reported                                                                                                       | 4        |                               |
| Objectives                   | 3        | State specific objectives, including any prespecified hypotheses                                                                                                                           | 5        |                               |
| <b>Methods</b>               |          |                                                                                                                                                                                            |          |                               |
| Study design                 | 4        | Present key elements of study design early in the paper                                                                                                                                    | 5        |                               |
| Setting                      | 5        | Describe the setting, locations, and relevant dates, including periods of recruitment, exposure, follow-up, and data collection                                                            | 5-6      |                               |
| Participants                 | 6        | (a) <i>Cohort study</i> —Give the eligibility criteria, and the sources and methods of selection of participants. Describe methods of follow-up                                            | 5-6      |                               |
|                              |          | <i>Case-control study</i> —Give the eligibility criteria, and the sources and methods of case ascertainment and control selection. Give the rationale for the choice of cases and controls |          |                               |
|                              |          | <i>Cross-sectional study</i> —Give the eligibility criteria, and the sources and methods of selection of participants                                                                      |          |                               |
|                              |          | (b) <i>Cohort study</i> —For matched studies, give matching criteria and number of exposed and unexposed                                                                                   |          |                               |
|                              |          | <i>Case-control study</i> —For matched studies, give matching criteria and the number of controls per case                                                                                 |          |                               |
| Variables                    | 7        | Clearly define all outcomes, exposures, predictors, potential confounders, and effect modifiers. Give diagnostic criteria, if applicable                                                   | 8        |                               |
| Data sources/<br>measurement | 8*       | For each variable of interest, give sources of data and details of methods of assessment (measurement). Describe comparability of assessment methods if there is more than one group       | 6-7      |                               |
| Bias                         | 9        | Describe any efforts to address potential sources of bias                                                                                                                                  |          |                               |
| Study size                   | 10       | Explain how the study size was arrived at                                                                                                                                                  |          |                               |

Continued on next page



|                        |     |                                                                                                                                                                                                                                                                                                           |       |
|------------------------|-----|-----------------------------------------------------------------------------------------------------------------------------------------------------------------------------------------------------------------------------------------------------------------------------------------------------------|-------|
| Quantitative variables | 11  | Explain how quantitative variables were handled in the analyses. If applicable, describe which groupings were chosen and why                                                                                                                                                                              |       |
| Statistical methods    | 12  | (a) Describe all statistical methods, including those used to control for confounding                                                                                                                                                                                                                     | 8     |
|                        |     | (b) Describe any methods used to examine subgroups and interactions                                                                                                                                                                                                                                       | 8     |
|                        |     | (c) Explain how missing data were addressed                                                                                                                                                                                                                                                               | 8-9   |
|                        |     | (d) <i>Cohort study</i> —If applicable, explain how loss to follow-up was addressed<br><i>Case-control study</i> —If applicable, explain how matching of cases and controls was addressed<br><i>Cross-sectional study</i> —If applicable, describe analytical methods taking account of sampling strategy |       |
|                        |     | (e) Describe any sensitivity analyses                                                                                                                                                                                                                                                                     | 9     |
| <b>Results</b>         |     |                                                                                                                                                                                                                                                                                                           |       |
| Participants           | 13* | (a) Report numbers of individuals at each stage of study—eg numbers potentially eligible, examined for eligibility, confirmed eligible, included in the study, completing follow-up, and analysed                                                                                                         | 10    |
|                        |     | (b) Give reasons for non-participation at each stage                                                                                                                                                                                                                                                      |       |
|                        |     | (c) Consider use of a flow diagram                                                                                                                                                                                                                                                                        |       |
| Descriptive data       | 14* | (a) Give characteristics of study participants (eg demographic, clinical, social) and information on exposures and potential confounders                                                                                                                                                                  | 12-13 |
|                        |     | (b) Indicate number of participants with missing data for each variable of interest                                                                                                                                                                                                                       |       |
|                        |     | (c) <i>Cohort study</i> —Summarise follow-up time (eg, average and total amount)                                                                                                                                                                                                                          | 10    |
| Outcome data           | 15* | <i>Cohort study</i> —Report numbers of outcome events or summary measures over time                                                                                                                                                                                                                       | 10    |
|                        |     | <i>Case-control study</i> —Report numbers in each exposure category, or summary measures of exposure                                                                                                                                                                                                      |       |
|                        |     | <i>Cross-sectional study</i> —Report numbers of outcome events or summary measures                                                                                                                                                                                                                        |       |
| Main results           | 16  | (a) Give unadjusted estimates and, if applicable, confounder-adjusted estimates and their precision (eg, 95% confidence interval). Make clear which confounders were adjusted for and why they were included                                                                                              | 14-16 |
|                        |     | (b) Report category boundaries when continuous variables were categorized                                                                                                                                                                                                                                 | 15    |
|                        |     | (c) If relevant, consider translating estimates of relative risk into absolute risk for a meaningful time period                                                                                                                                                                                          |       |

Continued on next page

|                          |    |                                                                                                                                                                            |    |
|--------------------------|----|----------------------------------------------------------------------------------------------------------------------------------------------------------------------------|----|
| Other analyses           | 17 | Report other analyses done—eg analyses of subgroups and interactions, and sensitivity analyses                                                                             | 17 |
| <b>Discussion</b>        |    |                                                                                                                                                                            |    |
| Key results              | 18 | Summarise key results with reference to study objectives                                                                                                                   | 18 |
| Limitations              | 19 | Discuss limitations of the study, taking into account sources of potential bias or imprecision. Discuss both direction and magnitude of any potential bias                 | 21 |
| Interpretation           | 20 | Give a cautious overall interpretation of results considering objectives, limitations, multiplicity of analyses, results from similar studies, and other relevant evidence | 22 |
| Generalisability         | 21 | Discuss the generalisability (external validity) of the study results                                                                                                      |    |
| <b>Other information</b> |    |                                                                                                                                                                            |    |
| Funding                  | 22 | Give the source of funding and the role of the funders for the present study and, if applicable, for the original study on which the present article is based              | 23 |

\*Give information separately for cases and controls in case-control studies and, if applicable, for exposed and unexposed groups in cohort and cross-sectional studies.

**Note:** An Explanation and Elaboration article discusses each checklist item and gives methodological background and published examples of transparent reporting. The STROBE checklist is best used in conjunction with this article (freely available on the Web sites of PLoS Medicine at <http://www.plosmedicine.org/>, Annals of Internal Medicine at <http://www.annals.org/>, and Epidemiology at <http://www.epidem.com/>). Information on the STROBE Initiative is available at [www.strobe-statement.org](http://www.strobe-statement.org).

1  
2  
3  
4  
5  
6  
7  
8  
9  
10  
11  
12  
13  
14  
15  
16  
17  
18  
19  
20  
21  
22  
23  
24  
25  
26  
27  
28  
29  
30  
31  
32  
33  
34  
35  
36  
37  
38  
39  
40  
41  
42  
43  
44  
45  
46  
47  
48  
49
