# Supplementary material for: Association of high-sensitivity cardiac troponin T with mortality and cardiovascular events in a community-based prospective study in Beijing
Source: PubMed Central journal article supplement — BMJ Open. 2017 Jun 26;7(6):e013431. doi: 10.1136/bmjopen-2016-013431 (PMC5541394; doi:10.1136/bmjopen-2016-013431), 2017-06-26
Supplement: bmjopen-2016-013431supp001.pdf [file bmjopen-2016-013431supp001.pdf]

**Supplementary Table1. Characteristics of Study Population between the follow up and lost groups**

| Characteristics                   | Baseline population         |                                    | P value |
|-----------------------------------|-----------------------------|------------------------------------|---------|
|                                   | Follow up group<br>(n=1499) | lost to follow up group<br>(n=181) |         |
| <b>Demographic</b>                |                             |                                    |         |
| Age ( years)                      | 61.4±11.4                   | 57.6±10.5                          | <0.01   |
| Male Sex n (%)                    | 629 (42.0)                  | 83(45.9)                           | 0.316   |
| BMI (kg/m <sup>2</sup> )          | 25.6±3.3                    | 25.8±3.4                           | 0.273   |
| <b>Medical history</b>            |                             |                                    |         |
| Hypertension n (%)                | 690(46.0)                   | 72(39.8)                           | 0.111   |
| Diabetes mellitus n (%)           | 292(19.5)                   | 30(16.6)                           | 0.348   |
| Current smoking n (%)             | 247(16.5)                   | 35(19.3)                           | 0.331   |
| Systolic BP (mm Hg)               | 132.7±17.0                  | 130.6±16.7                         | 0.136   |
| Diastolic BP (mm Hg)              | 76.6±10.3                   | 77.8±10.7                          | 0.077   |
| <b>Laboratory values</b>          |                             |                                    |         |
| FBG (mmol/L)                      | 5.4±1.6                     | 5.3±1.5                            | 0.474   |
| PBG (mmol/L)                      | 8.0±4.2                     | 7.5±3.7                            | <0.05   |
| Total cholesterol (mmol/L)        | 5.1±0.9                     | 5.0±0.9                            | 0.321   |
| Triglycerides (mmol/L)            | 1.8±1.2                     | 1.9±1.1                            | 0.054   |
| LDL cholesterol (mmol/L)          | 3.0±0.7                     | 2.9±0.6                            | 0.21    |
| HDL cholesterol (mmol/L)          | 1.4±0.3                     | 1.4±0.3                            | 0.386   |
| Uric acid (μmol/L)                | 291.4±73.3                  | 276.9±70.8                         | <0.01   |
| eGFR (mL/min/1.73m <sup>2</sup> ) | 88.9±15.5                   | 92.1±16.0                          | 0.009   |
| NT-proBNP (pg/mL)                 | 41.7(19.8,81.9)             | 37.4(17.3,73.9)                    | <0.01   |
| Hs-CRP (mg/L)                     | 2.3 (1.4, 3.5)              | 2.2 (1.3, 3.4)                     | 0.189   |
| <b>Medication use</b>             |                             |                                    |         |
| Antihypertensives n (%)           | 528 (35.2)                  | 55 (30.4)                          | 0.197   |
| Antidiabetic n (%)                | 189 (12.6)                  | 19 (10.5)                          | 0.415   |

|                |       |            |           |       |
|----------------|-------|------------|-----------|-------|
| Lipid lowering | n (%) | 262 (17.5) | 29(16.0)  | 0.625 |
| Aspirin        | n (%) | 360 (24.0) | 37 (20.4) | 0.285 |

---
